# Supplementary material for: Predictors and correlates of adherence to combination antiretroviral therapy (ART) for chronic HIV infection: a meta-analysis
Source: BMC Med. 2014 Aug 21;12:142. doi: 10.1186/s12916-014-0142-1 (PMC4148019; doi:10.1186/s12916-014-0142-1)

# Additional file 1: Forest plots of individual studies examining predictors/correlates

## Adherence self-efficacy

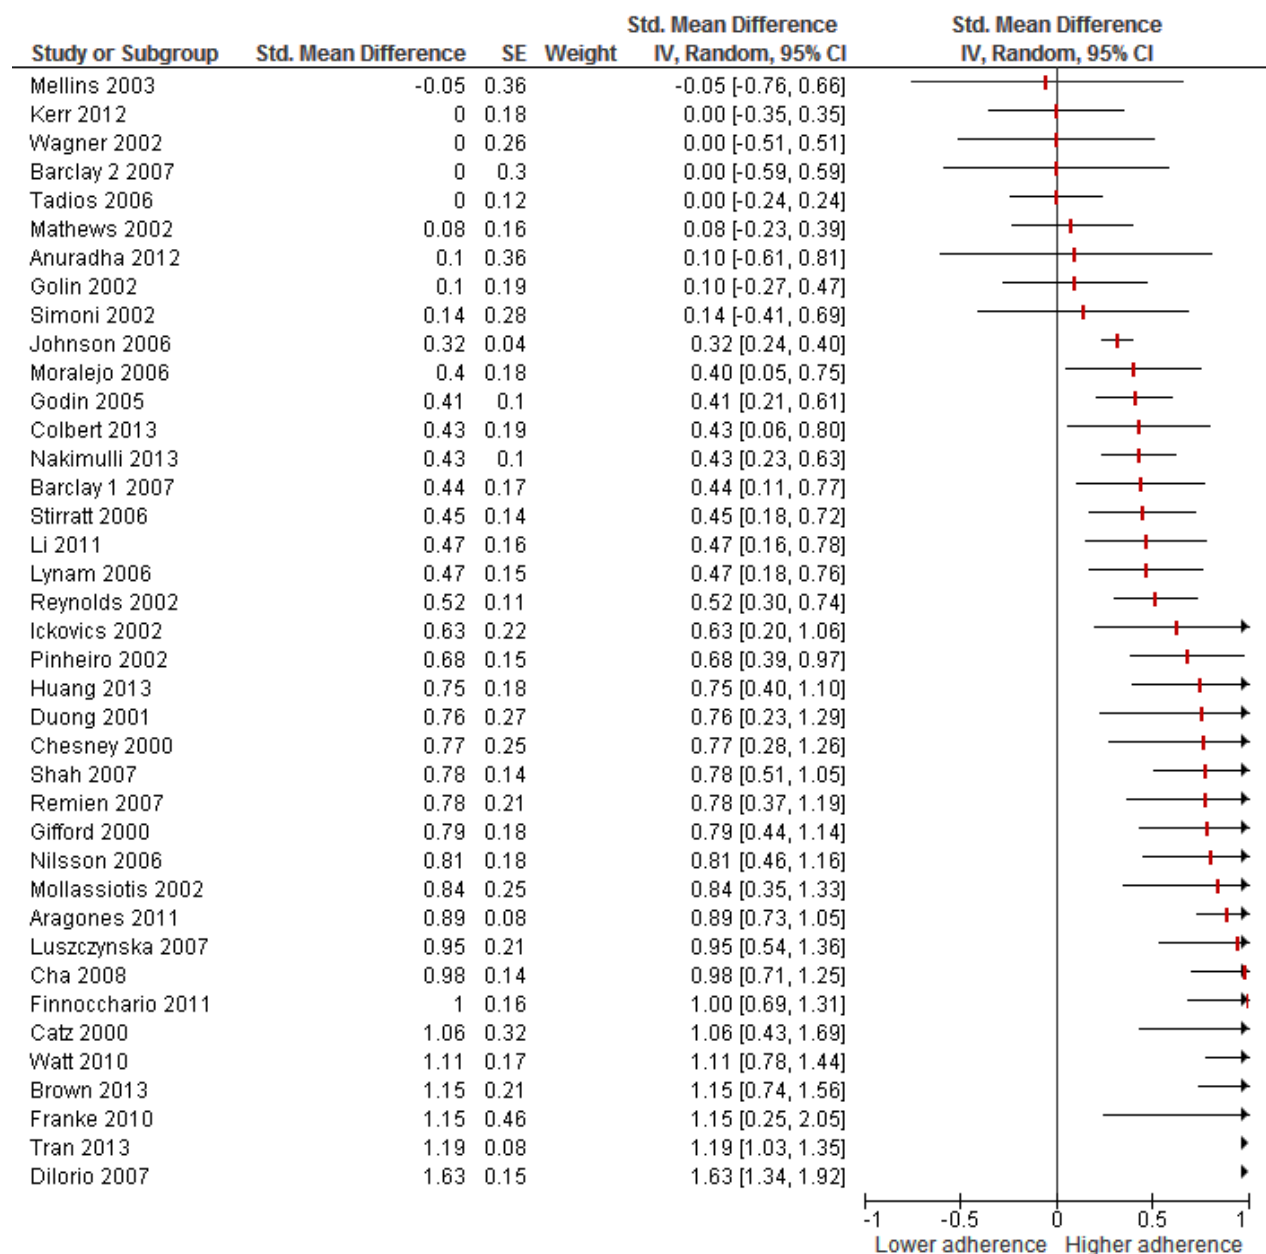

## Current substance use

| Study or Subgroup | Std. Mean Difference | SE    | Weight | Std. Mean Difference<br>IV, Random, 95% CI | Std. Mean Difference<br>IV, Random, 95% CI |
|-------------------|----------------------|-------|--------|--------------------------------------------|--------------------------------------------|
| Peltzer 2010      | -2.41                | 0.14  | 1.3%   | -2.41 [-2.68, -2.14]                       |                                            |
| Mellins 2003      | -1.74                | 0.348 | 0.7%   | -1.74 [-2.42, -1.06]                       |                                            |
| Berhe 2013        | -1.3                 | 0.12  | 1.3%   | -1.30 [-1.54, -1.06]                       |                                            |
| Plankey 2009      | -1.24                | 0.047 | 1.5%   | -1.24 [-1.33, -1.15]                       |                                            |
| Bonolo 2005       | -1.16                | 0.13  | 1.3%   | -1.16 [-1.41, -0.91]                       |                                            |
| Wasti 2012        | -1.04                | 0.135 | 1.3%   | -1.04 [-1.30, -0.78]                       |                                            |
| Falang 2012       | -1.01                | 0.112 | 1.3%   | -1.01 [-1.23, -0.79]                       |                                            |
| Ladefoged 2012    | -0.86                | 0.33  | 0.8%   | -0.86 [-1.51, -0.21]                       |                                            |
| King 2012         | -0.83                | 0.12  | 1.3%   | -0.83 [-1.07, -0.59]                       |                                            |
| Venkatesh 2010    | -0.71                | 0.149 | 1.2%   | -0.71 [-1.00, -0.42]                       |                                            |
| Boyer 2011        | -0.63                | 0.042 | 1.5%   | -0.63 [-0.71, -0.55]                       |                                            |
| Howard 2002       | -0.63                | 0.168 | 1.2%   | -0.63 [-0.96, -0.30]                       |                                            |
| Heckman 2004      | -0.62                | 0.126 | 1.3%   | -0.62 [-0.87, -0.37]                       |                                            |
| Catz 2000         | -0.62                | 0.252 | 1.0%   | -0.62 [-1.11, -0.13]                       |                                            |
| Gonzalez 2004     | -0.61                | 0.23  | 1.0%   | -0.61 [-1.06, -0.16]                       |                                            |
| Ammassari 2004    | -0.6                 | 0.188 | 1.1%   | -0.60 [-0.97, -0.23]                       |                                            |
| Chesney 2000      | -0.54                | 0.25  | 1.0%   | -0.54 [-1.03, -0.05]                       |                                            |
| Etienne 2010      | -0.54                | 0.07  | 1.4%   | -0.54 [-0.68, -0.40]                       |                                            |
| Finnocchiaro 2011 | -0.53                | 0.165 | 1.2%   | -0.53 [-0.85, -0.21]                       |                                            |
| Murphy 2004       | -0.53                | 0.187 | 1.1%   | -0.53 [-0.90, -0.16]                       |                                            |
| Fatima 2 2013     | -0.53                | 0.2   | 1.1%   | -0.53 [-0.92, -0.14]                       |                                            |
| Sodergard 2006    | -0.51                | 0.07  | 1.4%   | -0.51 [-0.65, -0.37]                       |                                            |
| Blackstock 2012   | -0.5                 | 0.165 | 1.2%   | -0.50 [-0.82, -0.18]                       |                                            |
| Cardarelli 2008   | -0.48                | 0.206 | 1.1%   | -0.48 [-0.88, -0.08]                       |                                            |
| Pratt 2001        | -0.46                | 0.13  | 1.3%   | -0.46 [-0.71, -0.21]                       |                                            |
| Uuskula 2012      | -0.45                | 0.164 | 1.2%   | -0.45 [-0.77, -0.13]                       |                                            |
| Andrade 2013      | -0.45                | 0.23  | 1.0%   | -0.45 [-0.90, 0.00]                        |                                            |
| Haubrich 1999     | -0.43                | 0.164 | 1.2%   | -0.43 [-0.75, -0.11]                       |                                            |
| Teixera 2012      | -0.43                | 0.17  | 1.2%   | -0.43 [-0.76, -0.10]                       |                                            |
| Fatima 1 2013     | -0.43                | 0.16  | 1.2%   | -0.43 [-0.74, -0.12]                       |                                            |
| Yun 2005          | -0.42                | 0.082 | 1.4%   | -0.42 [-0.58, -0.26]                       |                                            |
| Golin 2002        | -0.41                | 0.184 | 1.1%   | -0.41 [-0.77, -0.05]                       |                                            |
| Barclay 1 2007    | -0.41                | 0.184 | 1.1%   | -0.41 [-0.77, -0.05]                       |                                            |
| Mollassiotis 2002 | -0.41                | 0.184 | 1.1%   | -0.41 [-0.77, -0.05]                       |                                            |
| Elul 2013         | -0.39                | 0.06  | 1.4%   | -0.39 [-0.51, -0.27]                       |                                            |
| Lyimo 2014        | -0.39                | 0.16  | 1.2%   | -0.39 [-0.70, -0.08]                       |                                            |
| Pefura 2013       | -0.39                | 0.07  | 1.4%   | -0.39 [-0.53, -0.25]                       |                                            |
| Leserman 2008     | -0.39                | 0.2   | 1.1%   | -0.39 [-0.78, 0.00]                        |                                            |
| Kalichman 2003    | -0.38                | 0.21  | 1.1%   | -0.38 [-0.79, 0.03]                        |                                            |
| Kleeberger 2001   | -0.36                | 0.081 | 1.4%   | -0.36 [-0.52, -0.20]                       |                                            |
| Peretti 3 2006    | -0.33                | 0.101 | 1.4%   | -0.33 [-0.53, -0.13]                       |                                            |
| Campos 2010       | -0.33                | 0.122 | 1.3%   | -0.33 [-0.57, -0.09]                       |                                            |
| Simoni 2012       | -0.32                | 0.041 | 1.5%   | -0.32 [-0.40, -0.24]                       |                                            |
| Jacquet 2010      | -0.3                 | 0.08  | 1.4%   | -0.30 [-0.46, -0.14]                       |                                            |
| Kalichman 2010    | -0.29                | 0.141 | 1.3%   | -0.29 [-0.57, -0.01]                       |                                            |

Randomized 2010

Mugavero 2009

Peretti 2 2006

Kyser 2011

Do 2010

Nakimulli 2013

Peretti 1 2006

Juday 2011

Holstad 2006

Spire 2002

Protopopescu 2009

Silva 2009

Kacanek 2010

Tedaldi 2012

Sullivan 2007

Lazo 2 2007

Ukwe 2010

Johnson 2003

Kumar 2009

Parruti 2006

Glass 2010

Wagner 2011

Shuter 2008

Anuradha 2012

Babson 2013

Bottonari 2012

Unge 2010

Mathews 2002

Kerr 2012

Simoni 2002

Barclay 2 2007

Oyugi 2007

Ickovics 2002

Murri 2001

Lazo 1 2007

Weidle 2006

-0.28 0.121

-0.27 0.081

-0.27 0.12

-0.27 0.15

-0.26 0.1

-0.24 0.081

-0.23 0.101

-0.22 0.181

-0.22 0.101

-0.22 0.06

-0.21 0.1

-0.21 0.15

-0.2 0.09

-0.2 0.02

-0.2 0.06

-0.18 0.12

-0.16 0.04

-0.14 0.06

-0.11 0.16

-0.11 0.02

-0.1 0.14

-0.08 0.26

-0.06 0.12

-0.03 0.18

-0.01 0.14

0 0.1

0 0.16

0 0.12

0 0.3

0 0.3

0 0.2

0.07 0.22

0.14 0.18

0.21 0.08

0.72 0.07

-0.28 [-0.52, -0.04]

-0.27 [-0.43, -0.11]

-0.27 [-0.51, -0.03]

-0.27 [-0.56, 0.02]

-0.26 [-0.46, -0.06]

-0.24 [-0.40, -0.08]

-0.23 [-0.43, -0.03]

-0.22 [-0.57, 0.13]

-0.22 [-0.42, -0.02]

-0.22 [-0.34, -0.10]

-0.21 [-0.41, -0.01]

-0.21 [-0.50, 0.08]

-0.20 [-0.38, -0.02]

-0.20 [-0.24, -0.16]

-0.20 [-0.32, -0.08]

-0.18 [-0.42, 0.06]

-0.16 [-0.24, -0.08]

-0.14 [-0.26, -0.02]

-0.11 [-0.42, 0.20]

-0.11 [-0.15, -0.07]

-0.10 [-0.37, 0.17]

-0.08 [-0.59, 0.43]

-0.06 [-0.30, 0.18]

-0.03 [-0.38, 0.32]

-0.01 [-0.28, 0.26]

0.00 [-0.20, 0.20]

0.00 [-0.31, 0.31]

0.00 [-0.24, 0.24]

0.00 [-0.59, 0.59]

0.00 [-0.59, 0.59]

0.00 [-0.39, 0.39]

0.07 [-0.36, 0.50]

0.14 [-0.21, 0.49]

0.21 [0.05, 0.37]

0.72 [0.58, 0.86]

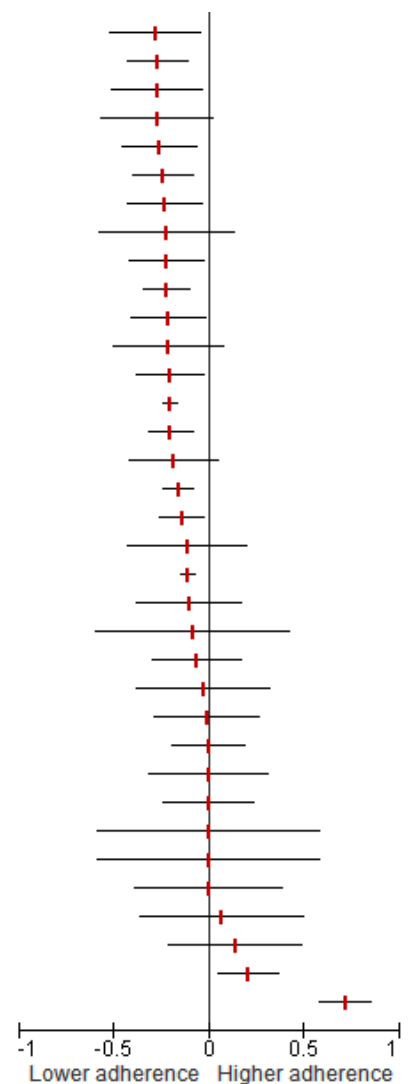

## Concerns about cART

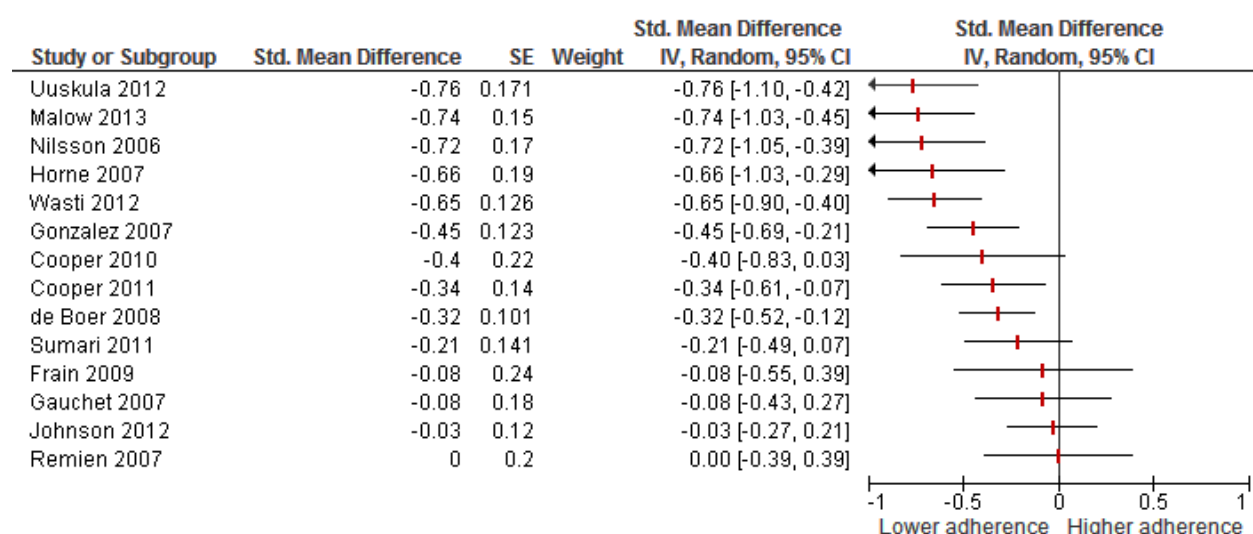

## Trust /satisfaction HIV care provider

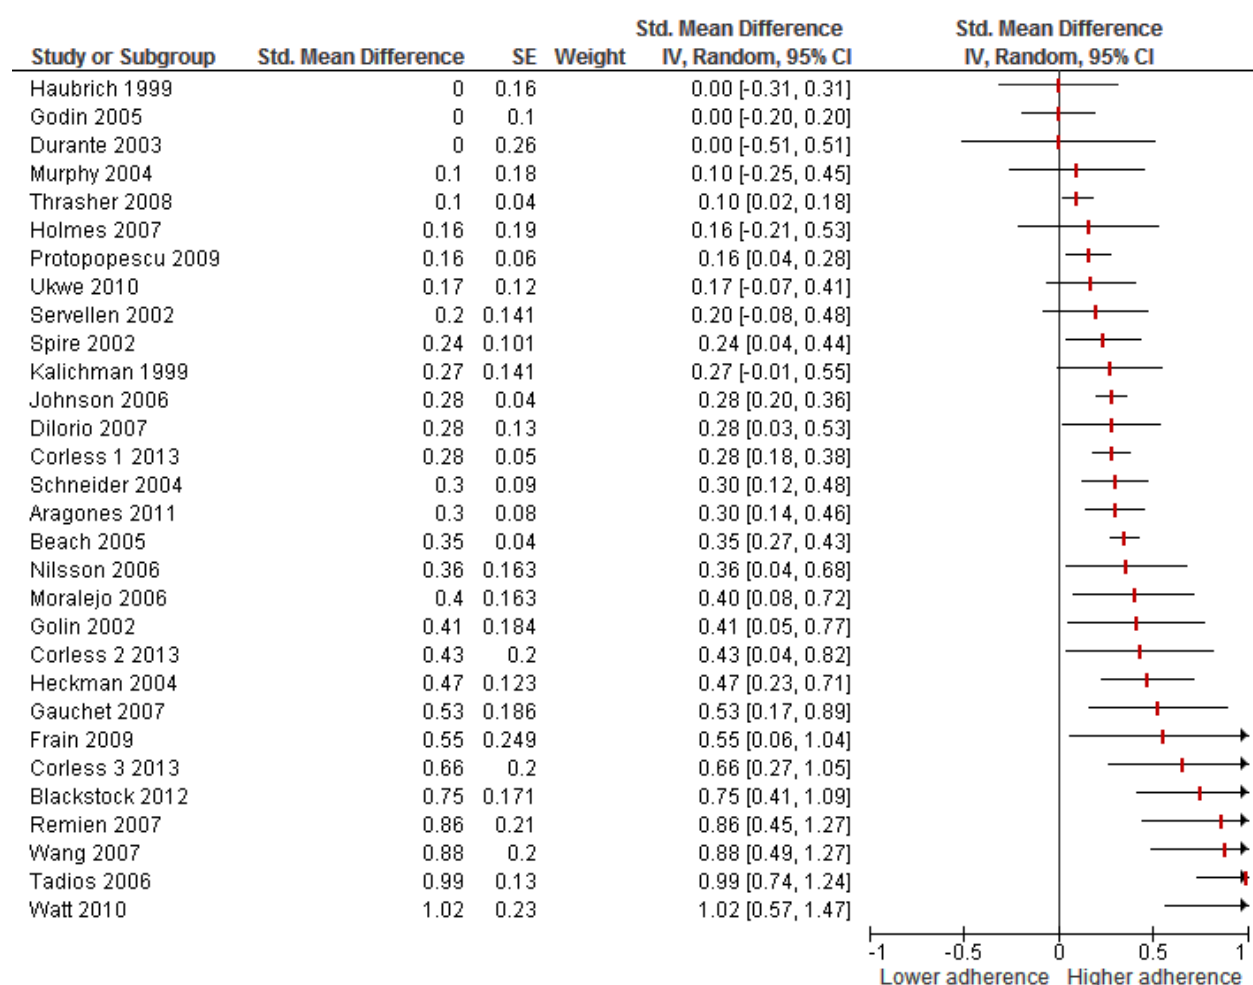

## Belief necessity/utility of ART

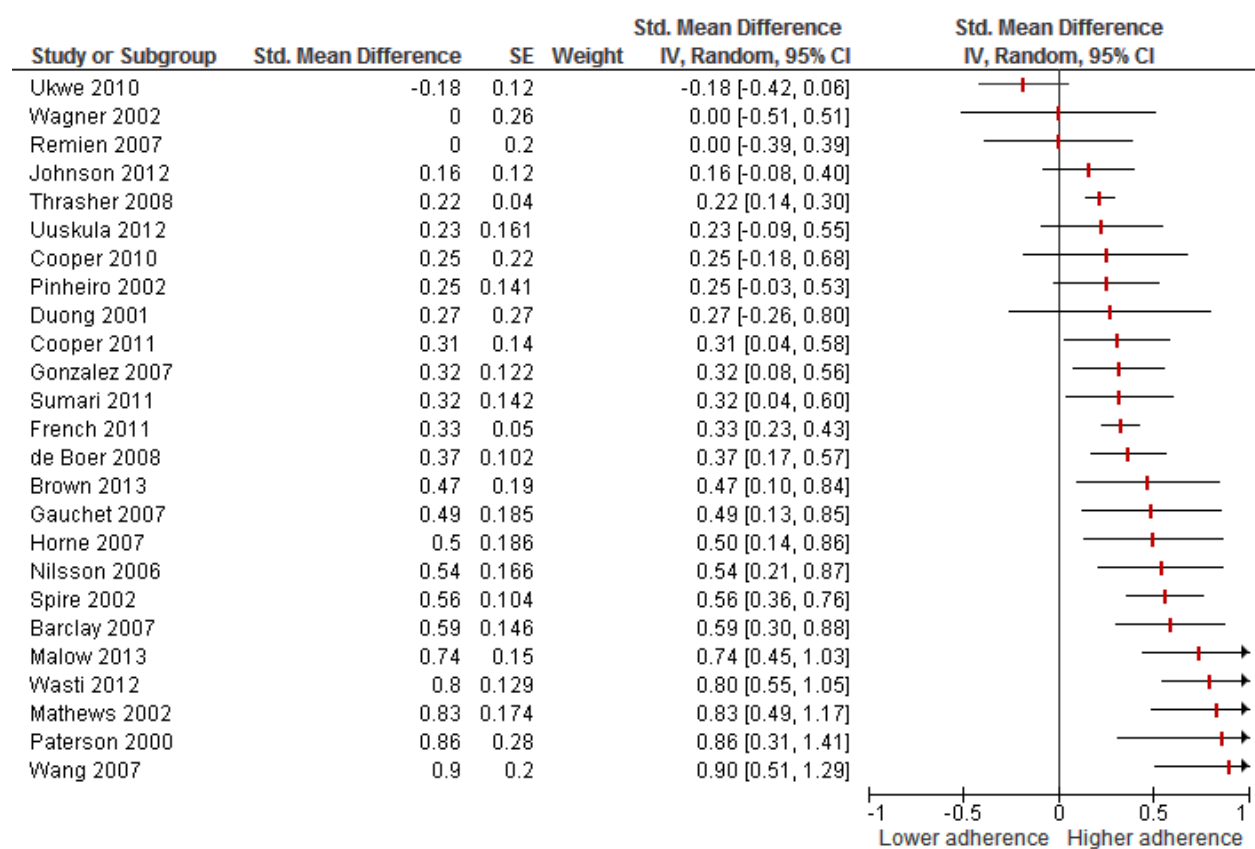

## Depressive symptoms

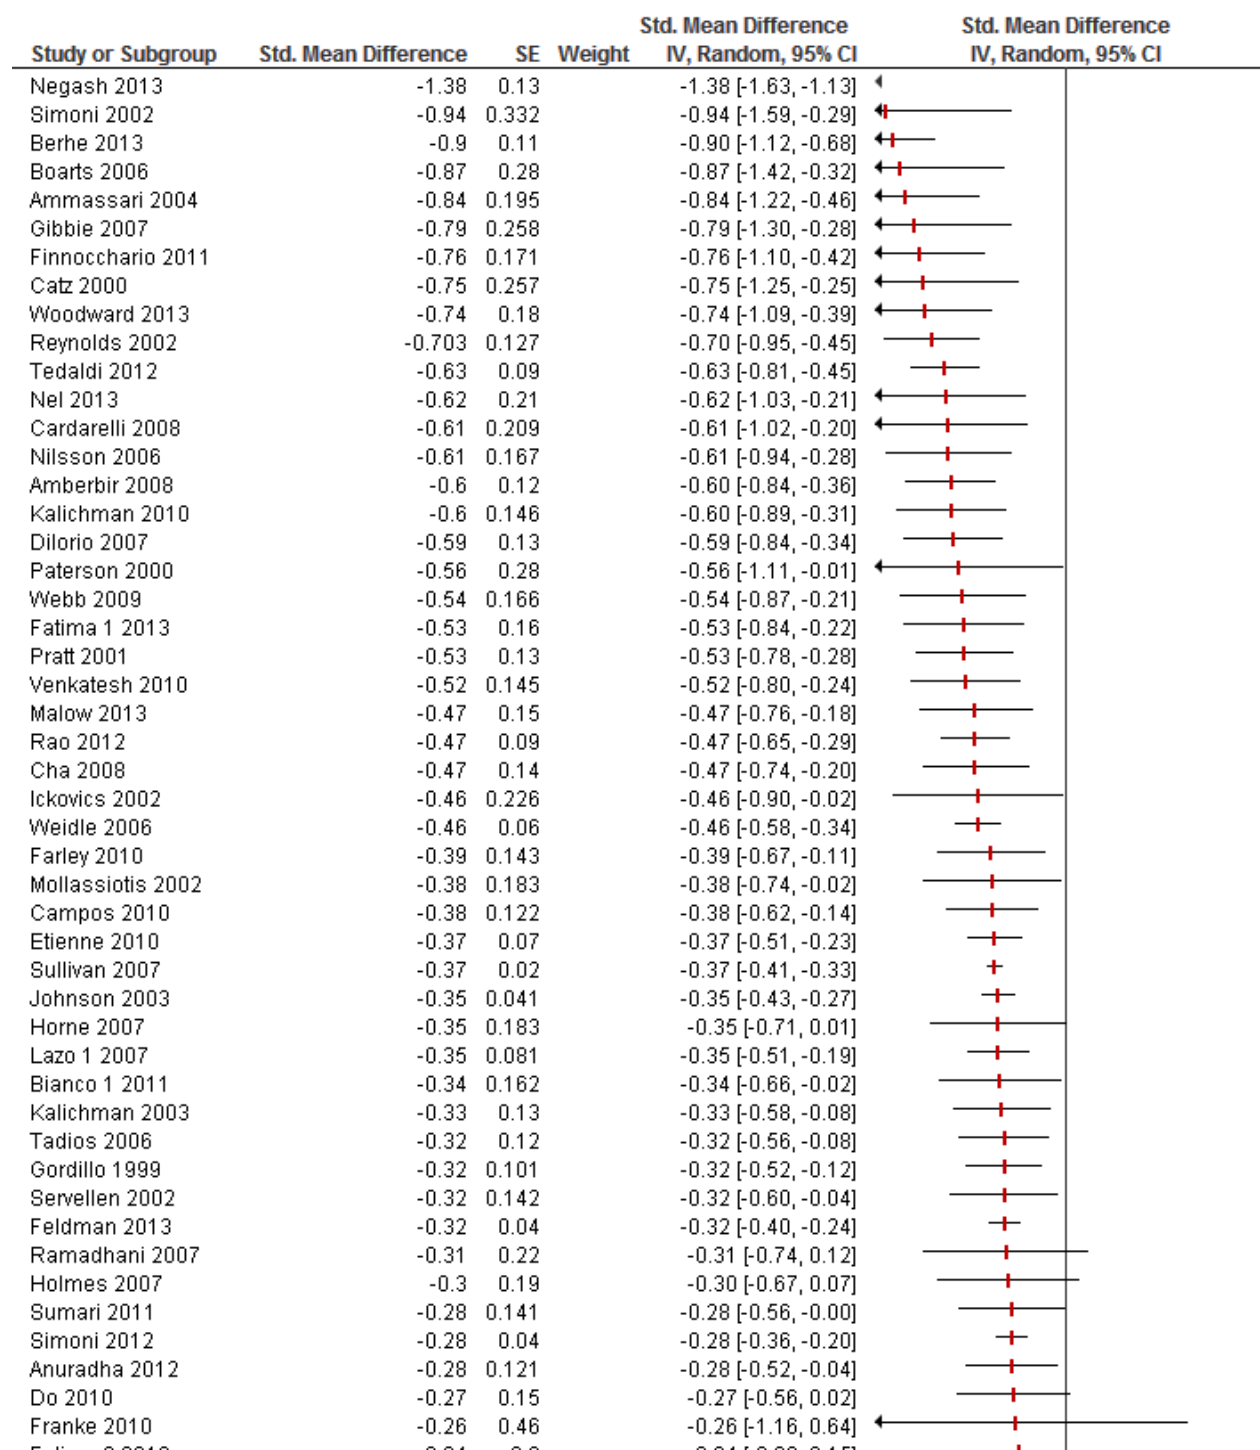

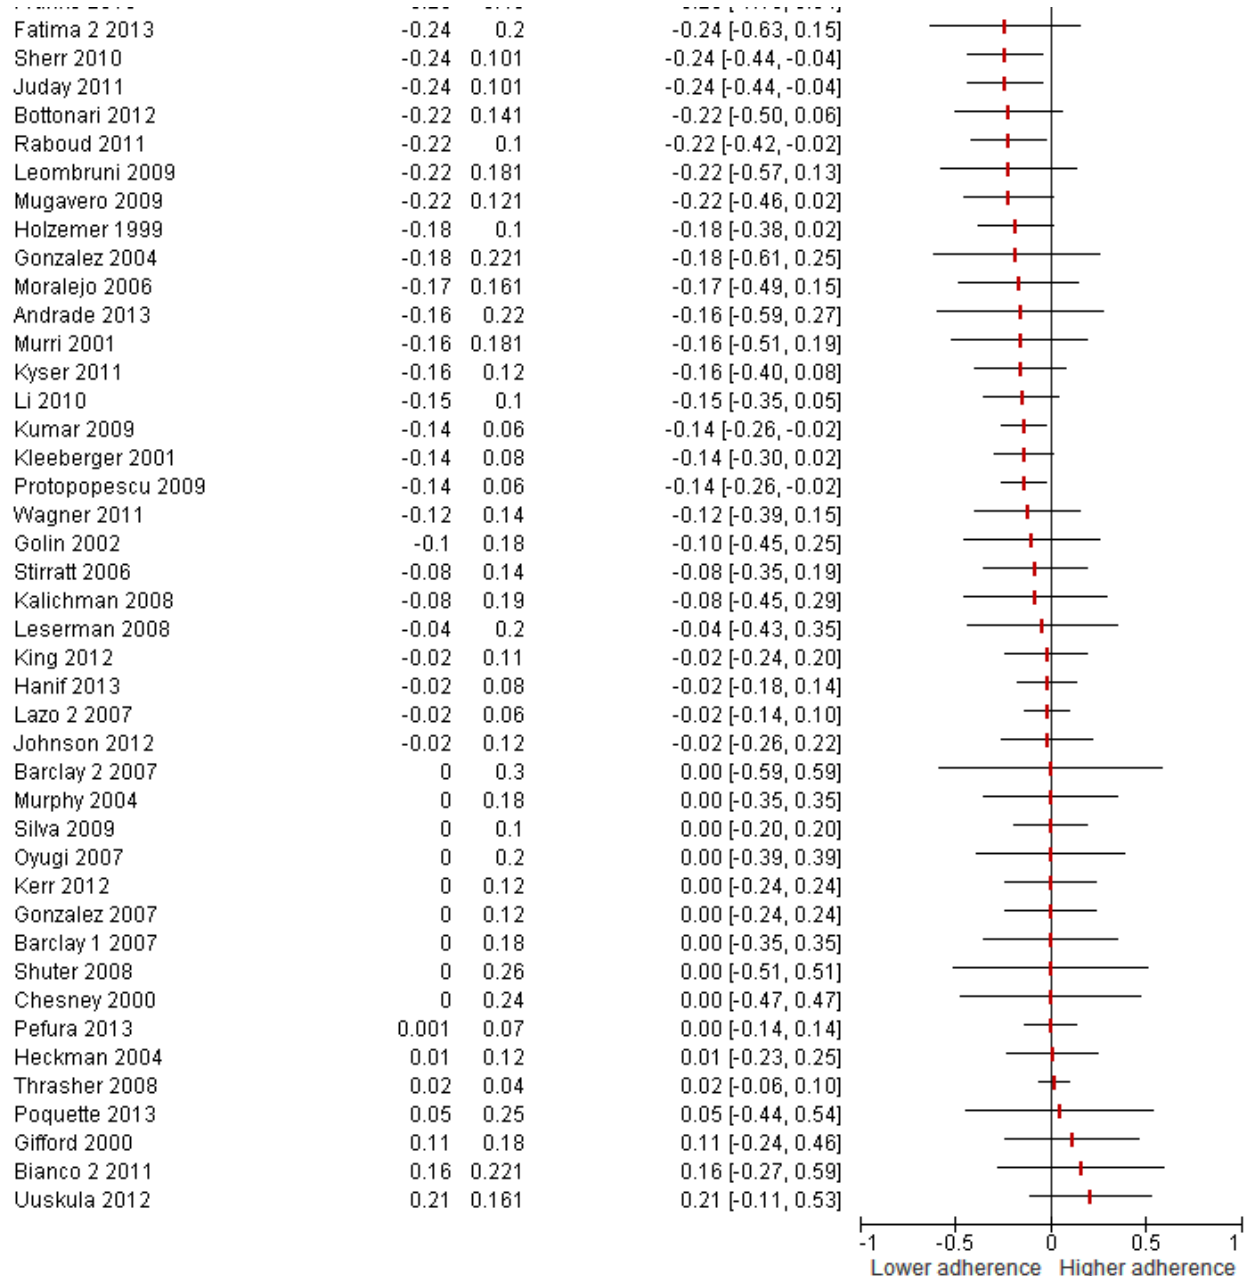

# HIV stigma

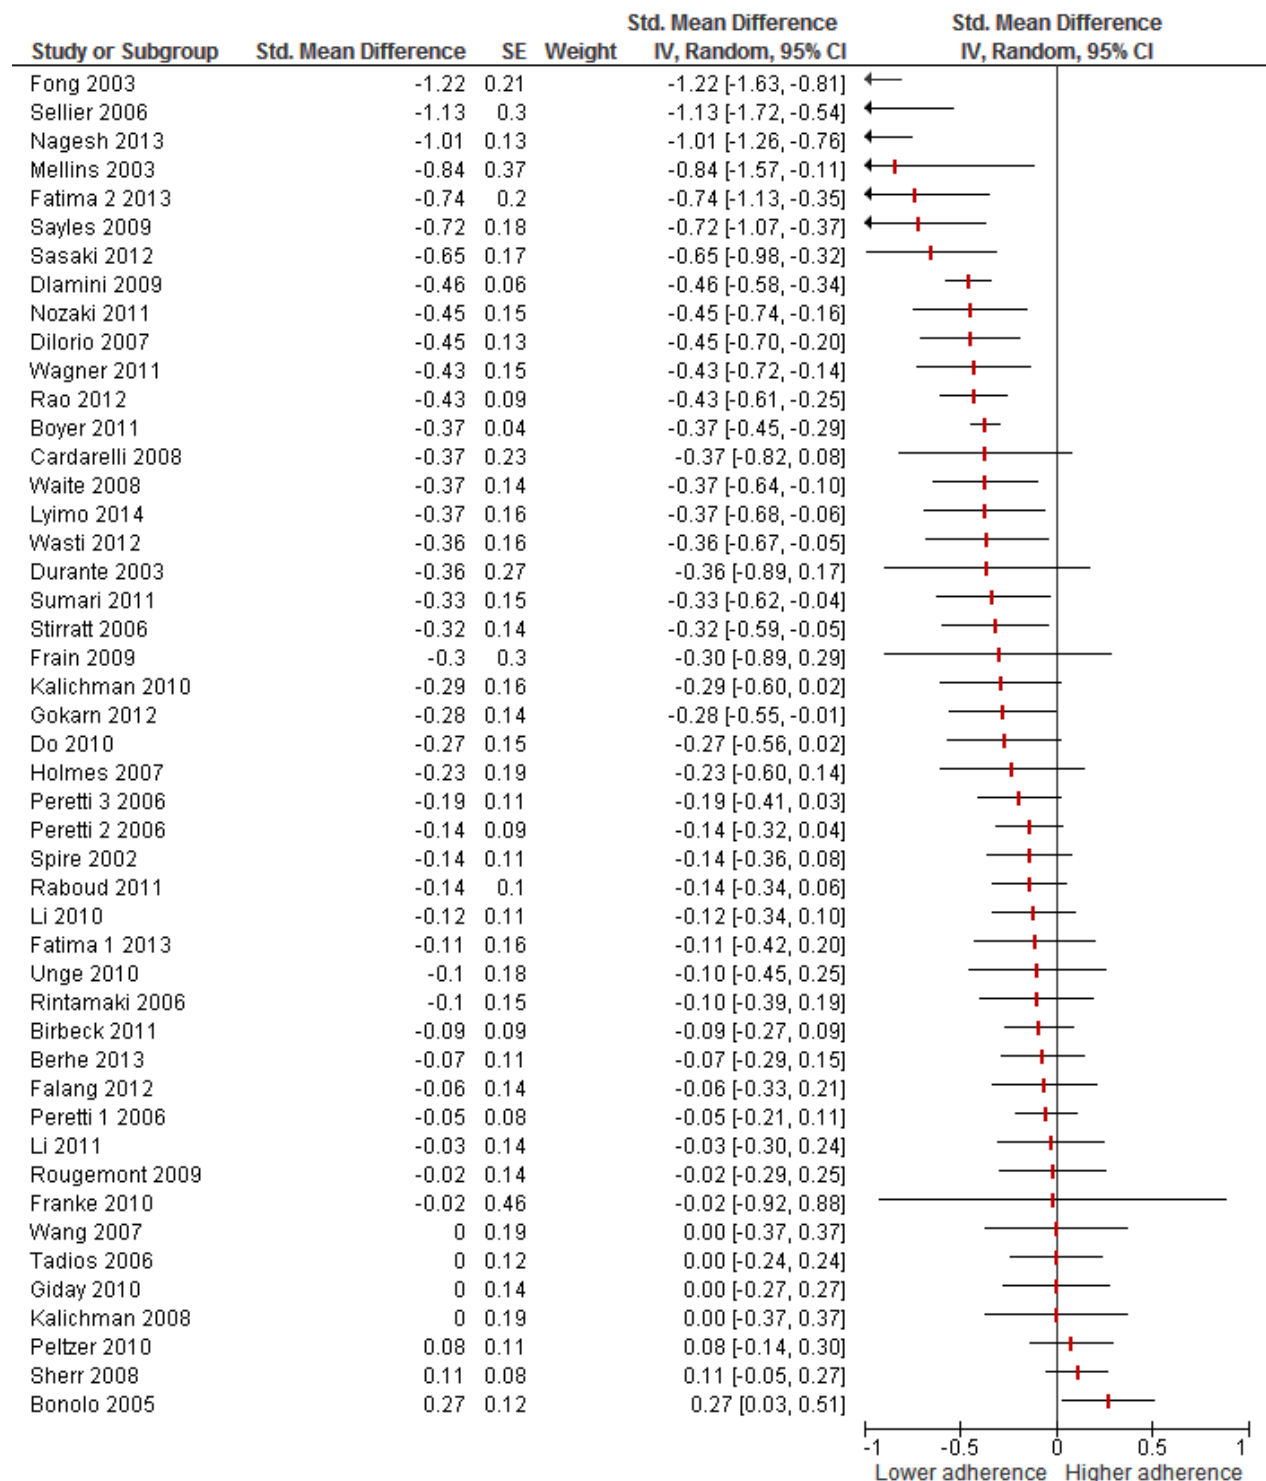

## Social support

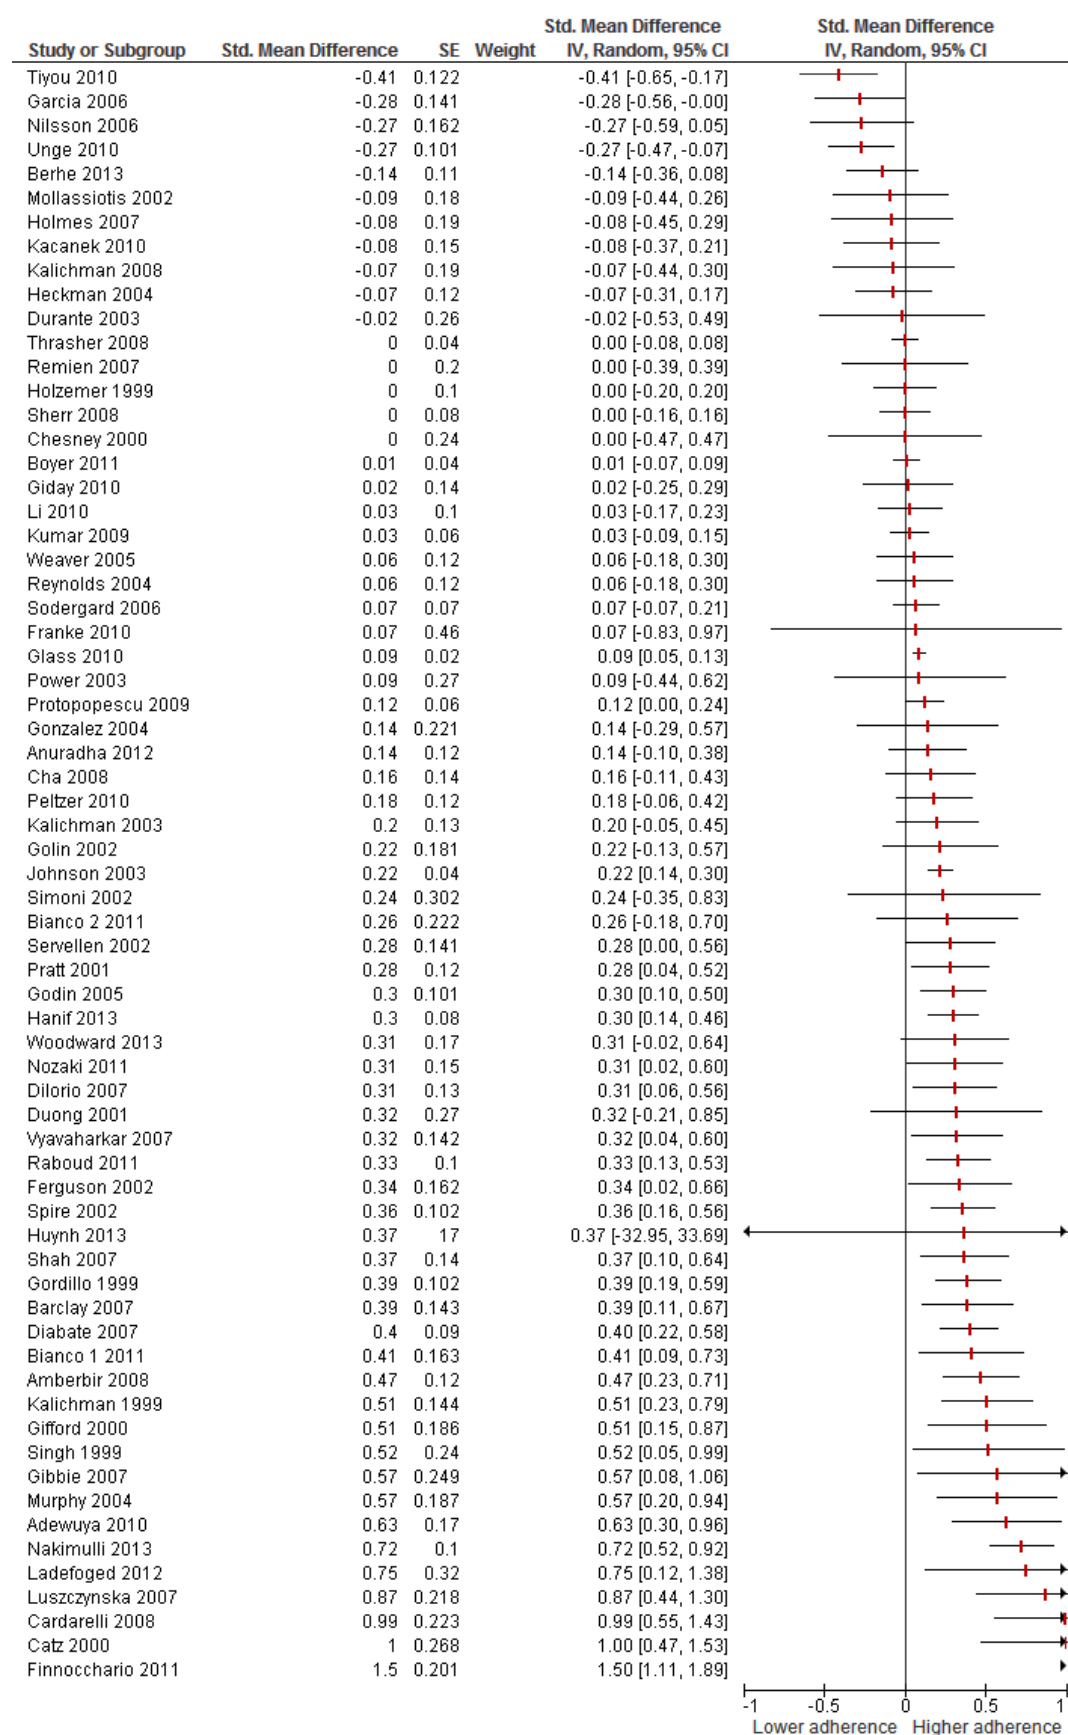

## PI containing regimen

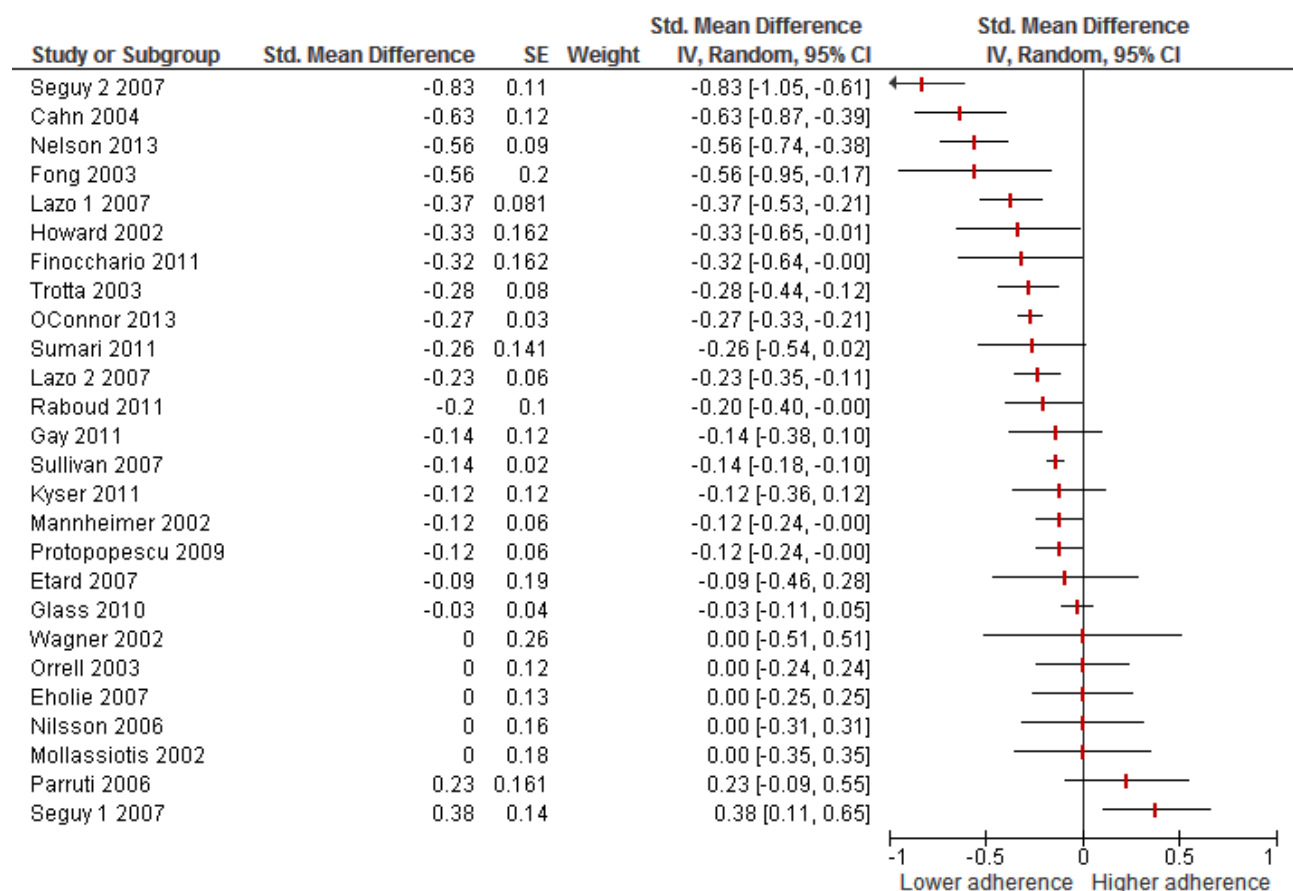

## Daily dosing frequency

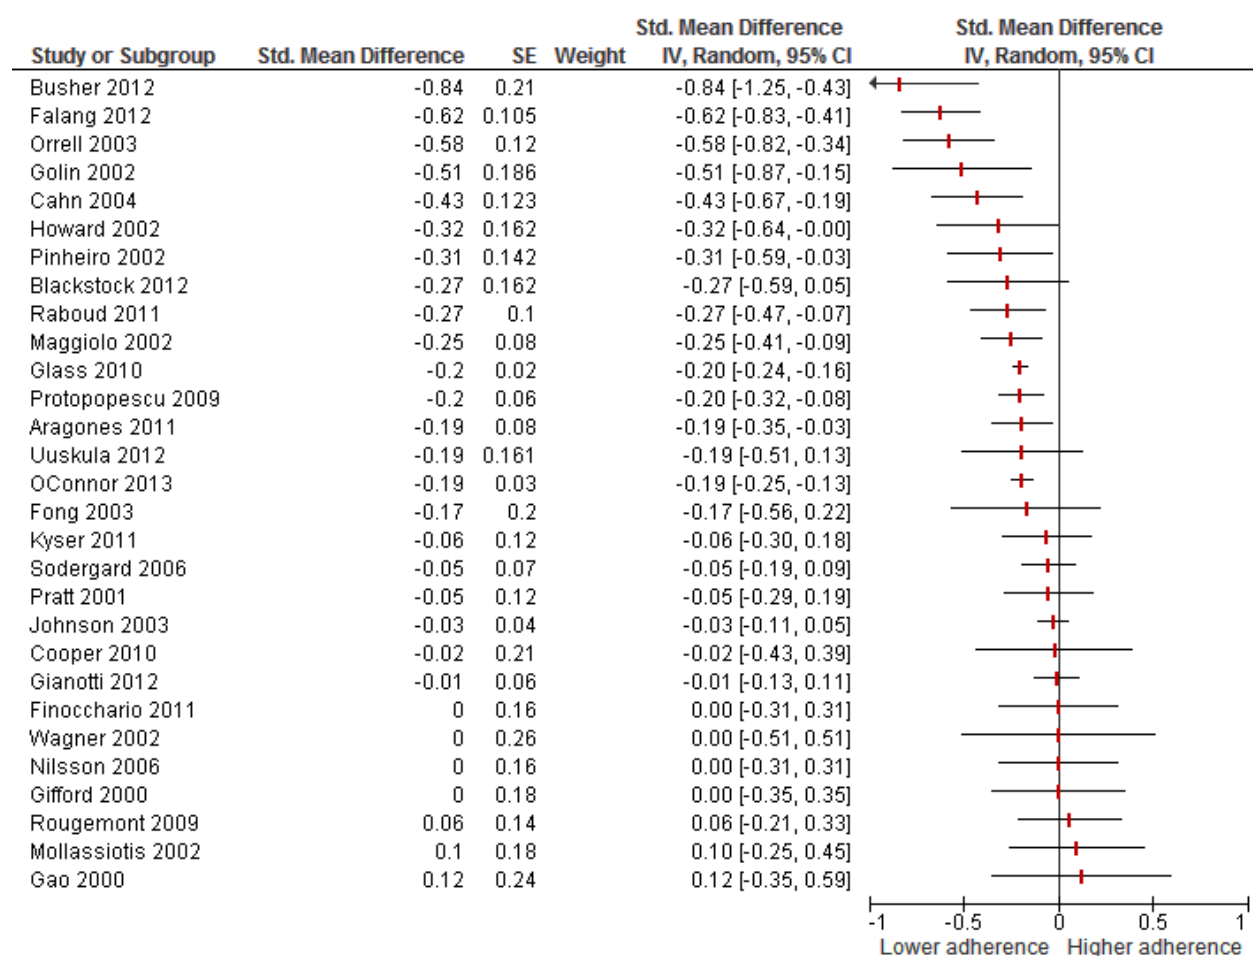

## Financial constraints

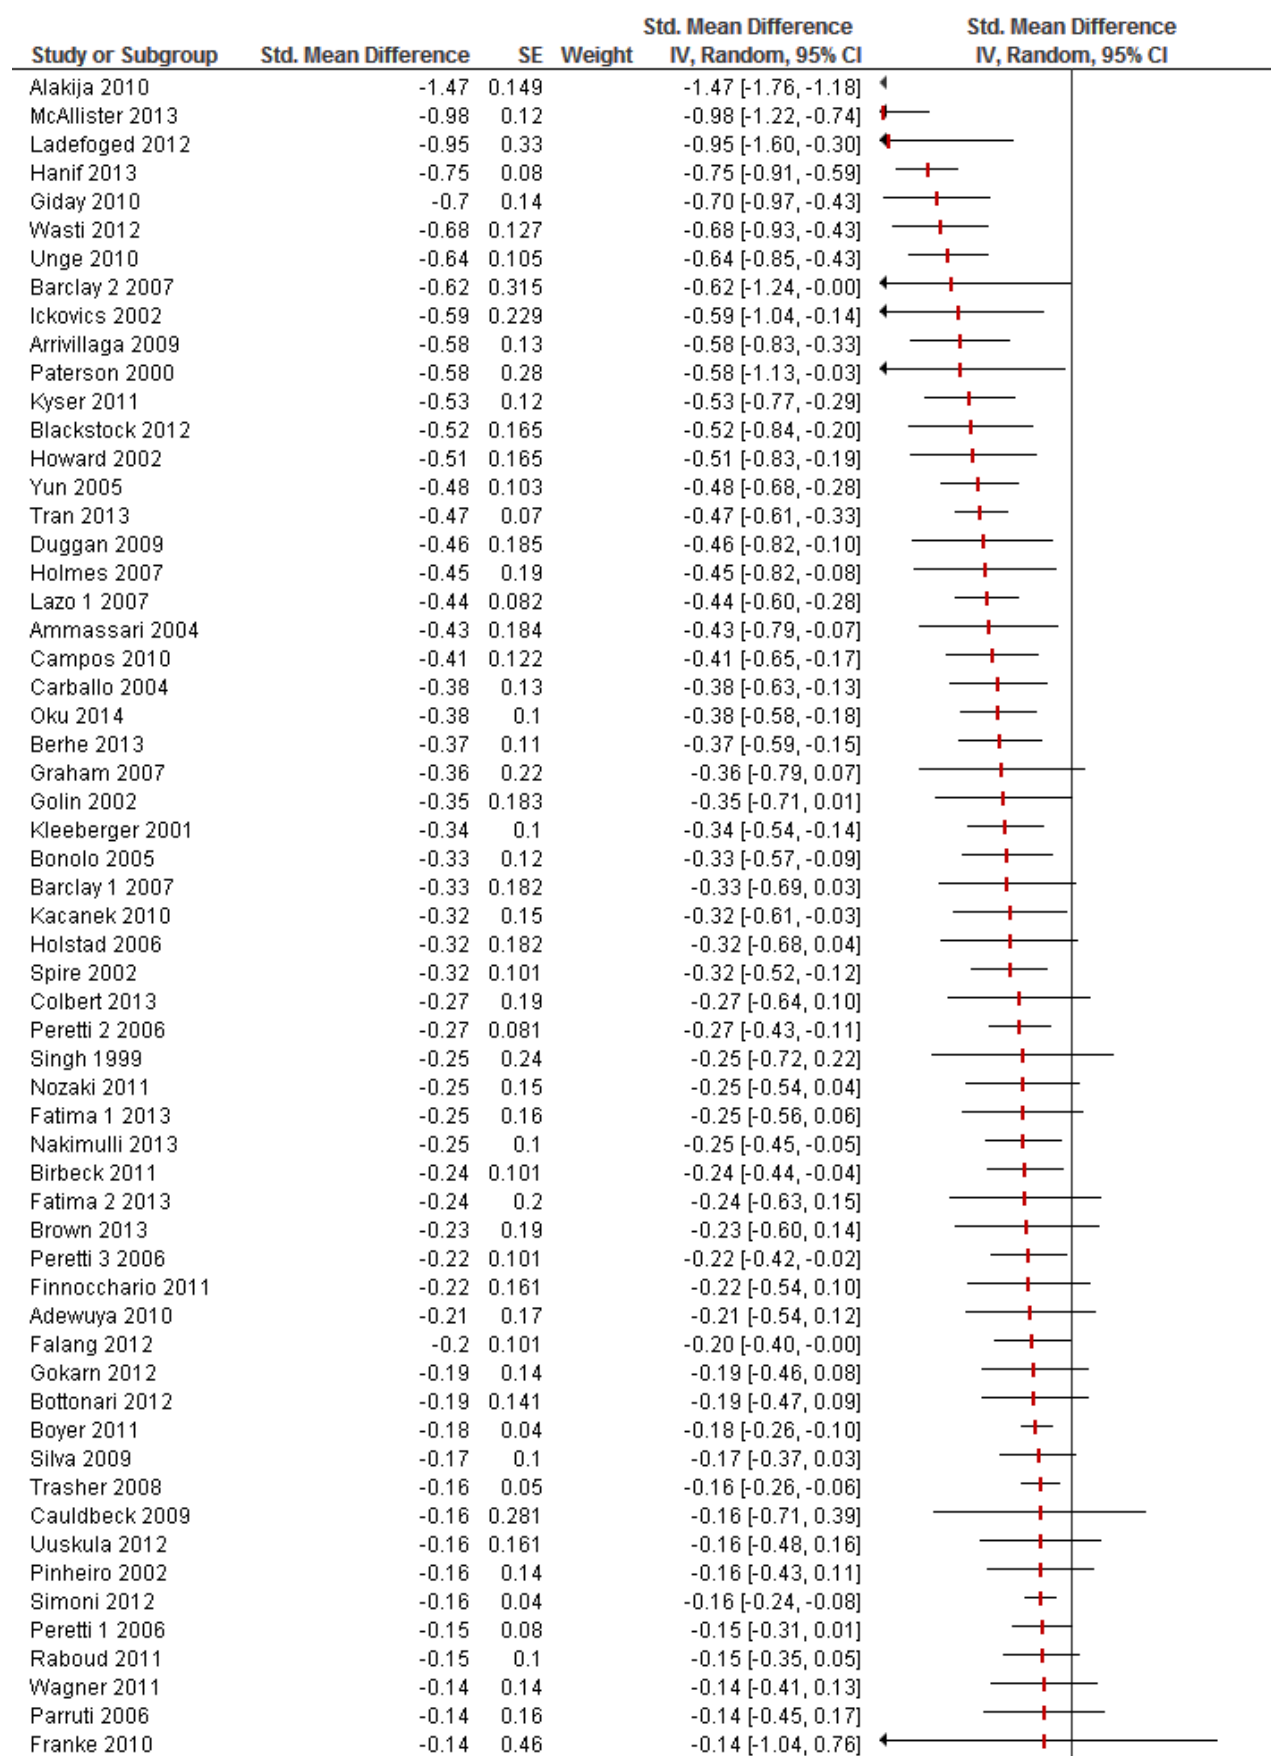

|                   |       |       |                      |
|-------------------|-------|-------|----------------------|
| Johnson 2003      | -0.13 | 0.04  | -0.13 [-0.21, -0.05] |
| Tiyou 2010        | -0.12 | 0.12  | -0.12 [-0.36, 0.12]  |
| Gibbie 2007       | -0.1  | 0.24  | -0.10 [-0.57, 0.37]  |
| Leserman 2008     | -0.09 | 0.2   | -0.09 [-0.48, 0.30]  |
| Lazo 2 2007       | -0.08 | 0.06  | -0.08 [-0.20, 0.04]  |
| Weaver 2005       | -0.08 | 0.12  | -0.08 [-0.32, 0.16]  |
| Gao 2000          | -0.08 | 0.24  | -0.08 [-0.55, 0.39]  |
| Ukwe 2010         | -0.07 | 0.12  | -0.07 [-0.31, 0.17]  |
| Protopopescu 2009 | -0.06 | 0.06  | -0.06 [-0.18, 0.06]  |
| Frain 2009        | -0.06 | 0.24  | -0.06 [-0.53, 0.41]  |
| Garcia 2006       | -0.06 | 0.14  | -0.06 [-0.33, 0.21]  |
| Huynh 2013        | -0.06 | 0.17  | -0.06 [-0.39, 0.27]  |
| Li 2010           | -0.05 | 0.1   | -0.05 [-0.25, 0.15]  |
| Dilorio 2007      | -0.02 | 0.22  | -0.02 [-0.45, 0.41]  |
| Gay 2011          | -0.01 | 0.12  | -0.01 [-0.25, 0.23]  |
| Sayles 2009       | -0.01 | 0.17  | -0.01 [-0.34, 0.32]  |
| Juday 2011        | -0.01 | 0.1   | -0.01 [-0.21, 0.19]  |
| Kamau 2011        | 0     | 0.1   | 0.00 [-0.20, 0.20]   |
| Anuradha 2012     | 0     | 0.12  | 0.00 [-0.24, 0.24]   |
| Oyugi 2007        | 0     | 0.2   | 0.00 [-0.39, 0.39]   |
| Wang 2007         | 0     | 0.19  | 0.00 [-0.37, 0.37]   |
| Gonzalez 2004     | 0     | 0.22  | 0.00 [-0.43, 0.43]   |
| Bianco 2011       | 0     | 0.12  | 0.00 [-0.24, 0.24]   |
| Eholie 2007       | 0     | 0.13  | 0.00 [-0.25, 0.25]   |
| Tadios 2006       | 0     | 0.12  | 0.00 [-0.24, 0.24]   |
| Safren 2005       | 0     | 0.13  | 0.00 [-0.25, 0.25]   |
| Do 2010           | 0     | 0.15  | 0.00 [-0.29, 0.29]   |
| Holzemer 1999     | 0     | 0.1   | 0.00 [-0.20, 0.20]   |
| Remien 2007       | 0     | 0.2   | 0.00 [-0.39, 0.39]   |
| Wagner 2002       | 0     | 0.26  | 0.00 [-0.51, 0.51]   |
| Heckman 2004      | 0     | 0.12  | 0.00 [-0.24, 0.24]   |
| Vyavaharkar 2007  | 0     | 0.14  | 0.00 [-0.27, 0.27]   |
| Gonzalez 2007     | 0     | 0.12  | 0.00 [-0.24, 0.24]   |
| Orrell 2003       | 0     | 0.12  | 0.00 [-0.24, 0.24]   |
| Peltzer 2010      | 0     | 0.11  | 0.00 [-0.22, 0.22]   |
| Chesney 2000      | 0     | 0.24  | 0.00 [-0.47, 0.47]   |
| Kerr 2012         | 0     | 0.12  | 0.00 [-0.24, 0.24]   |
| Catz 2000         | 0     | 0.24  | 0.00 [-0.47, 0.47]   |
| Rodrigues 2012    | 0.001 | 0.24  | 0.00 [-0.47, 0.47]   |
| Kalichman 2010    | 0.01  | 0.14  | 0.01 [-0.26, 0.28]   |
| Dortz 2003        | 0.01  | 0.3   | 0.01 [-0.58, 0.60]   |
| Servellen 2002    | 0.04  | 0.14  | 0.04 [-0.23, 0.31]   |
| Sherr 2010        | 0.05  | 0.1   | 0.05 [-0.15, 0.25]   |
| Kalichman 1999    | 0.06  | 0.14  | 0.06 [-0.21, 0.33]   |
| Busher 2012       | 0.14  | 0.2   | 0.14 [-0.25, 0.53]   |
| Shah 2007         | 0.18  | 0.14  | 0.18 [-0.09, 0.45]   |
| Kumar 2009        | 0.2   | 0.06  | 0.20 [0.08, 0.32]    |
| Brigido 2001      | 0.23  | 0.342 | 0.23 [-0.44, 0.90]   |
| Elul 2013         | 0.27  | 0.06  | 0.27 [0.15, 0.39]    |
| Venkatash 2010    | 0.33  | 0.142 | 0.33 [0.05, 0.61]    |
| Sellier 2006      | 1.64  | 0.32  | 1.64 [1.01, 2.27]    |

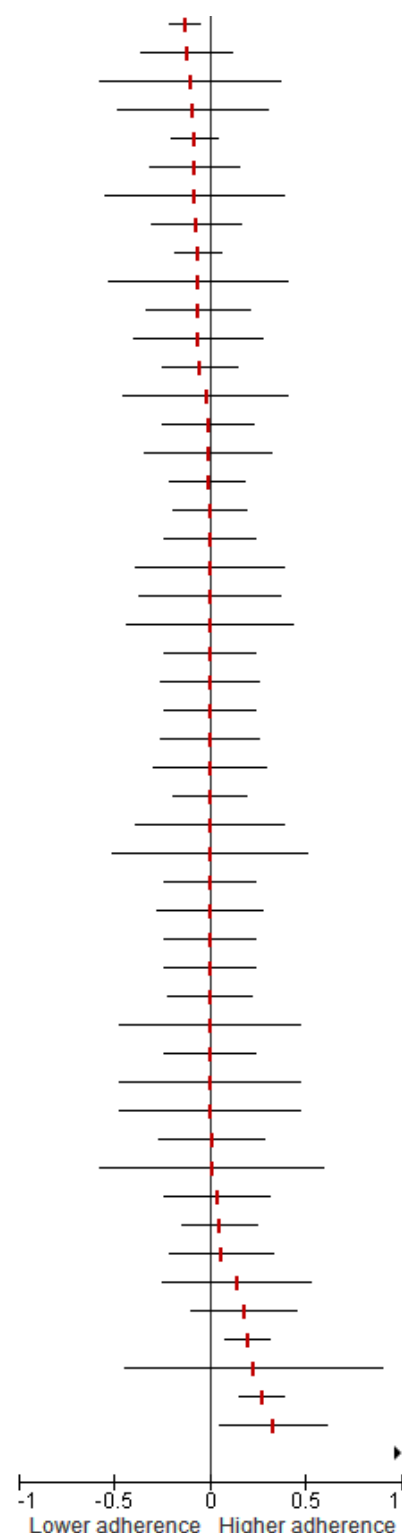

## Pill burden

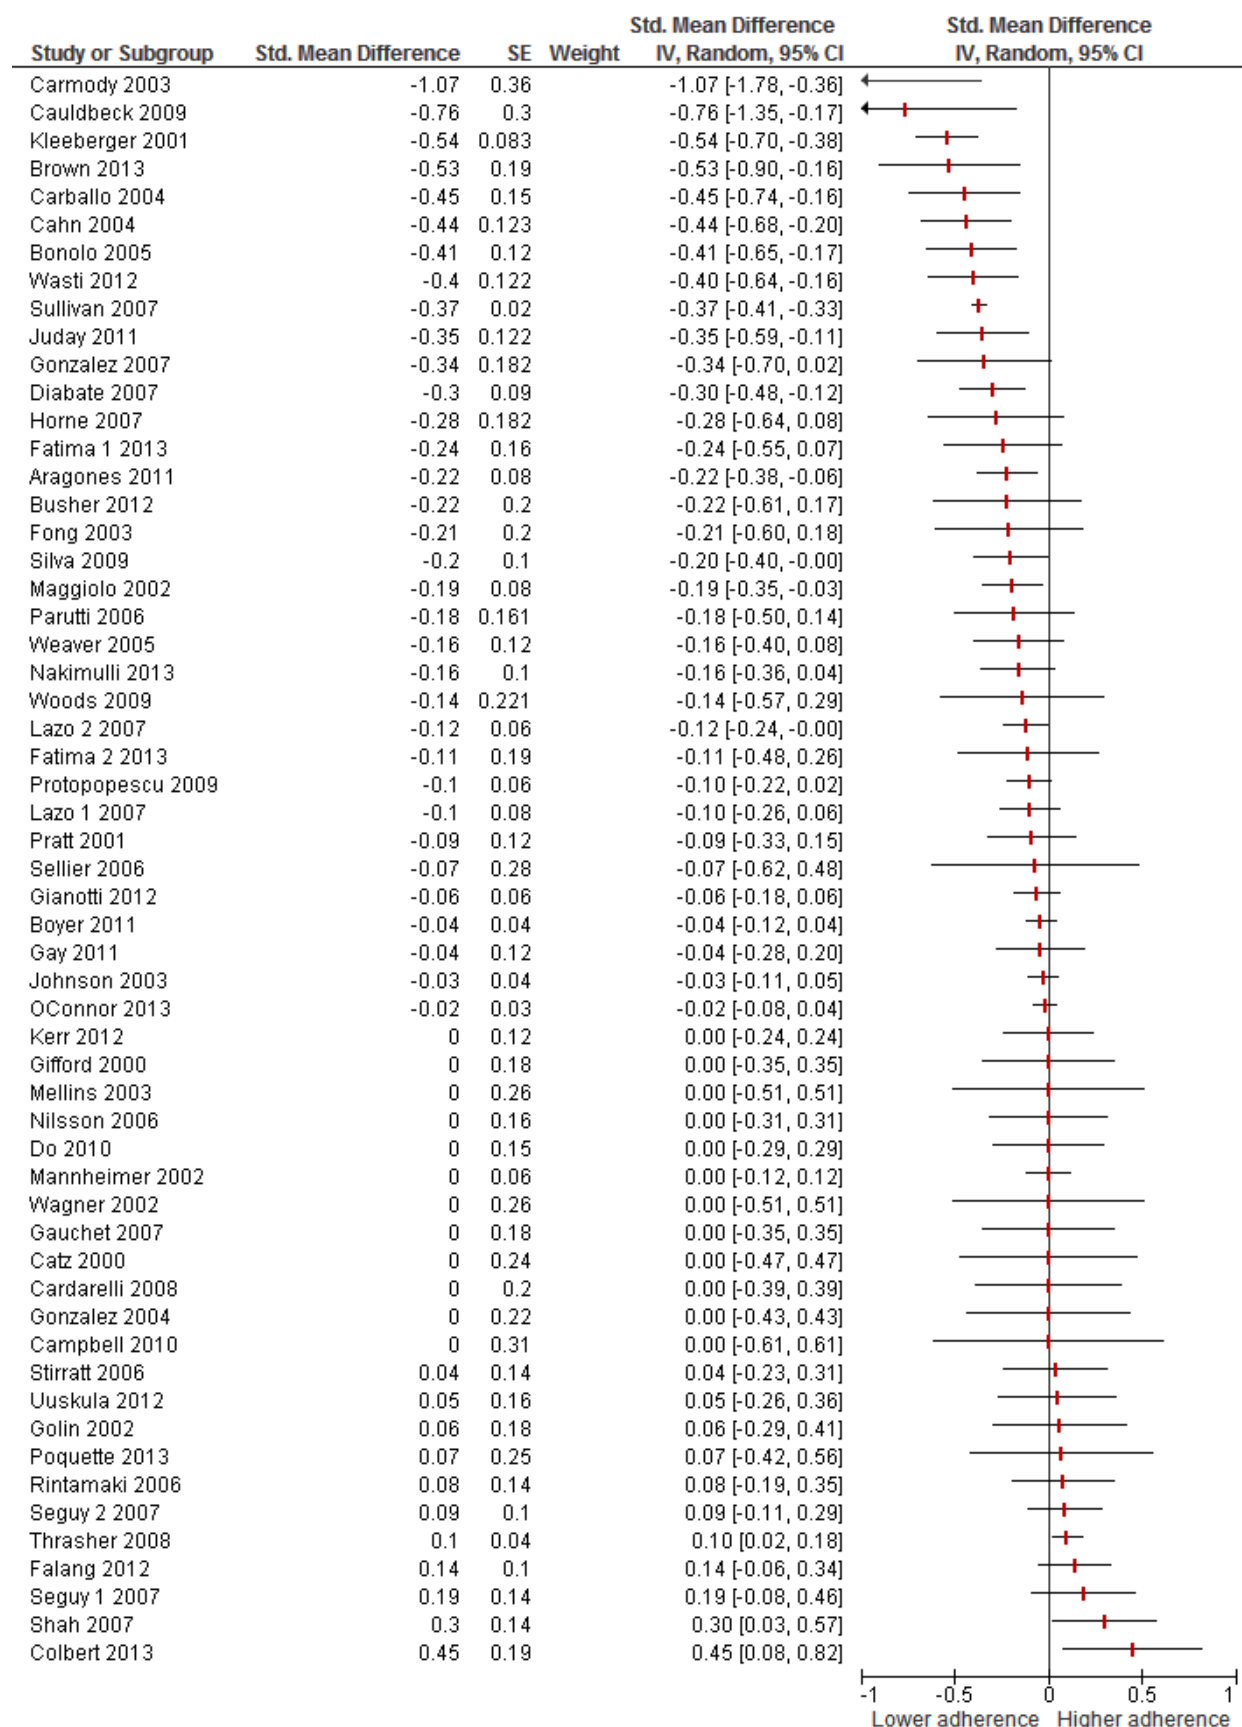

# Age

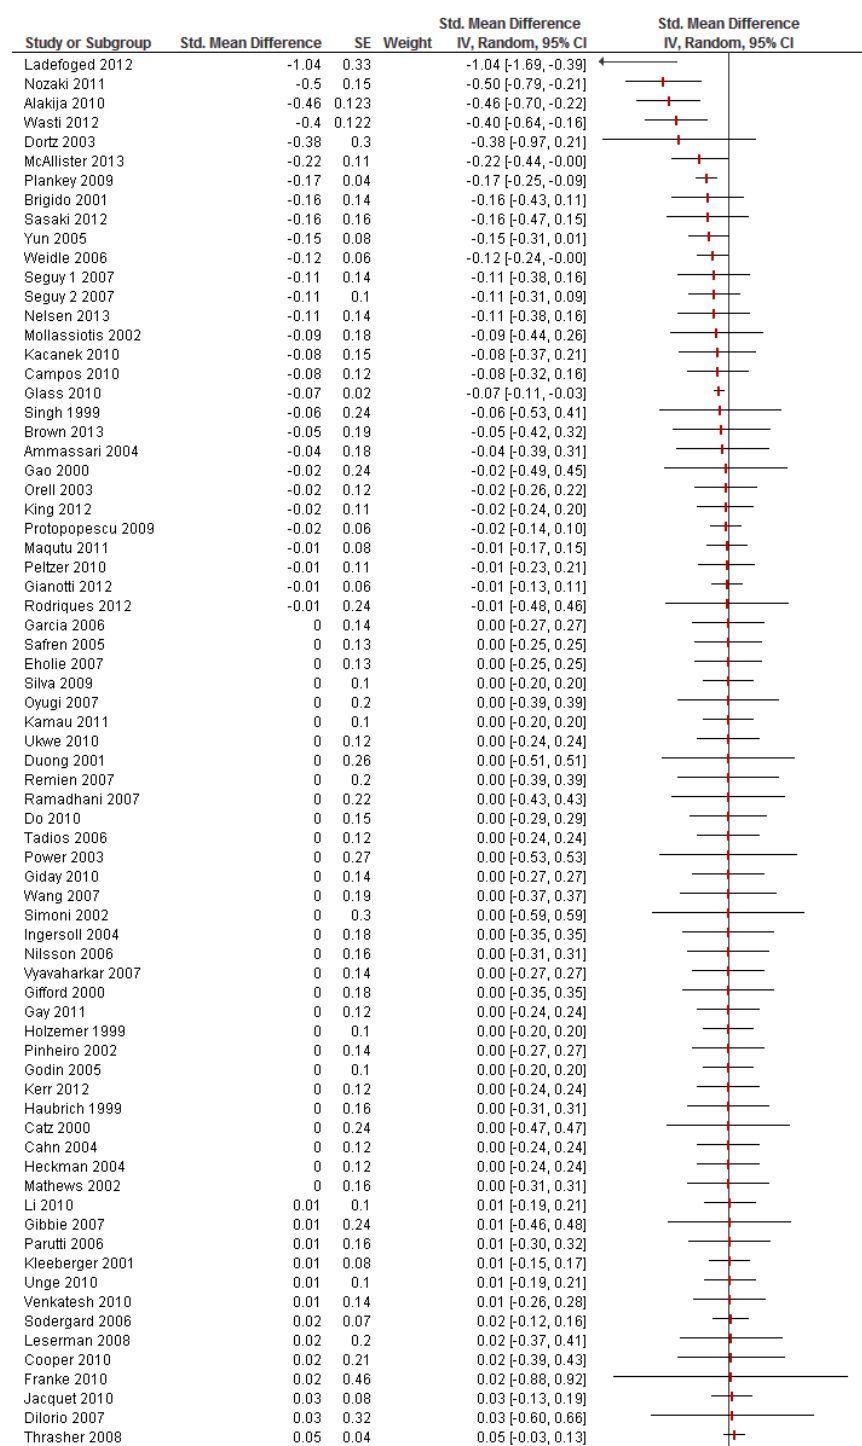

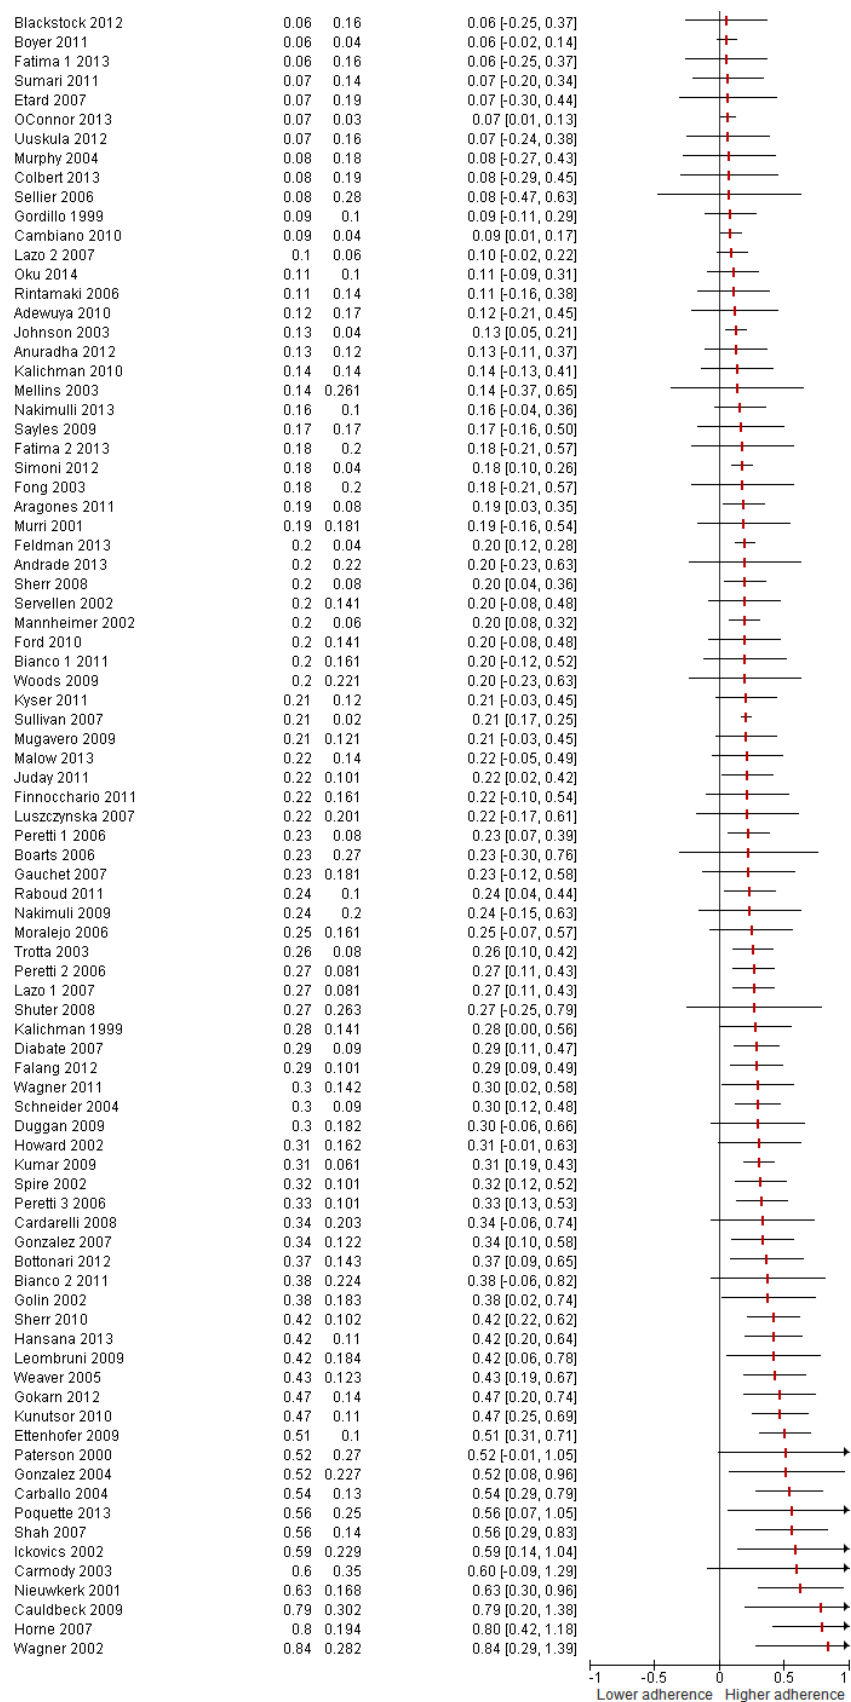

## Time since HIV diagnosis

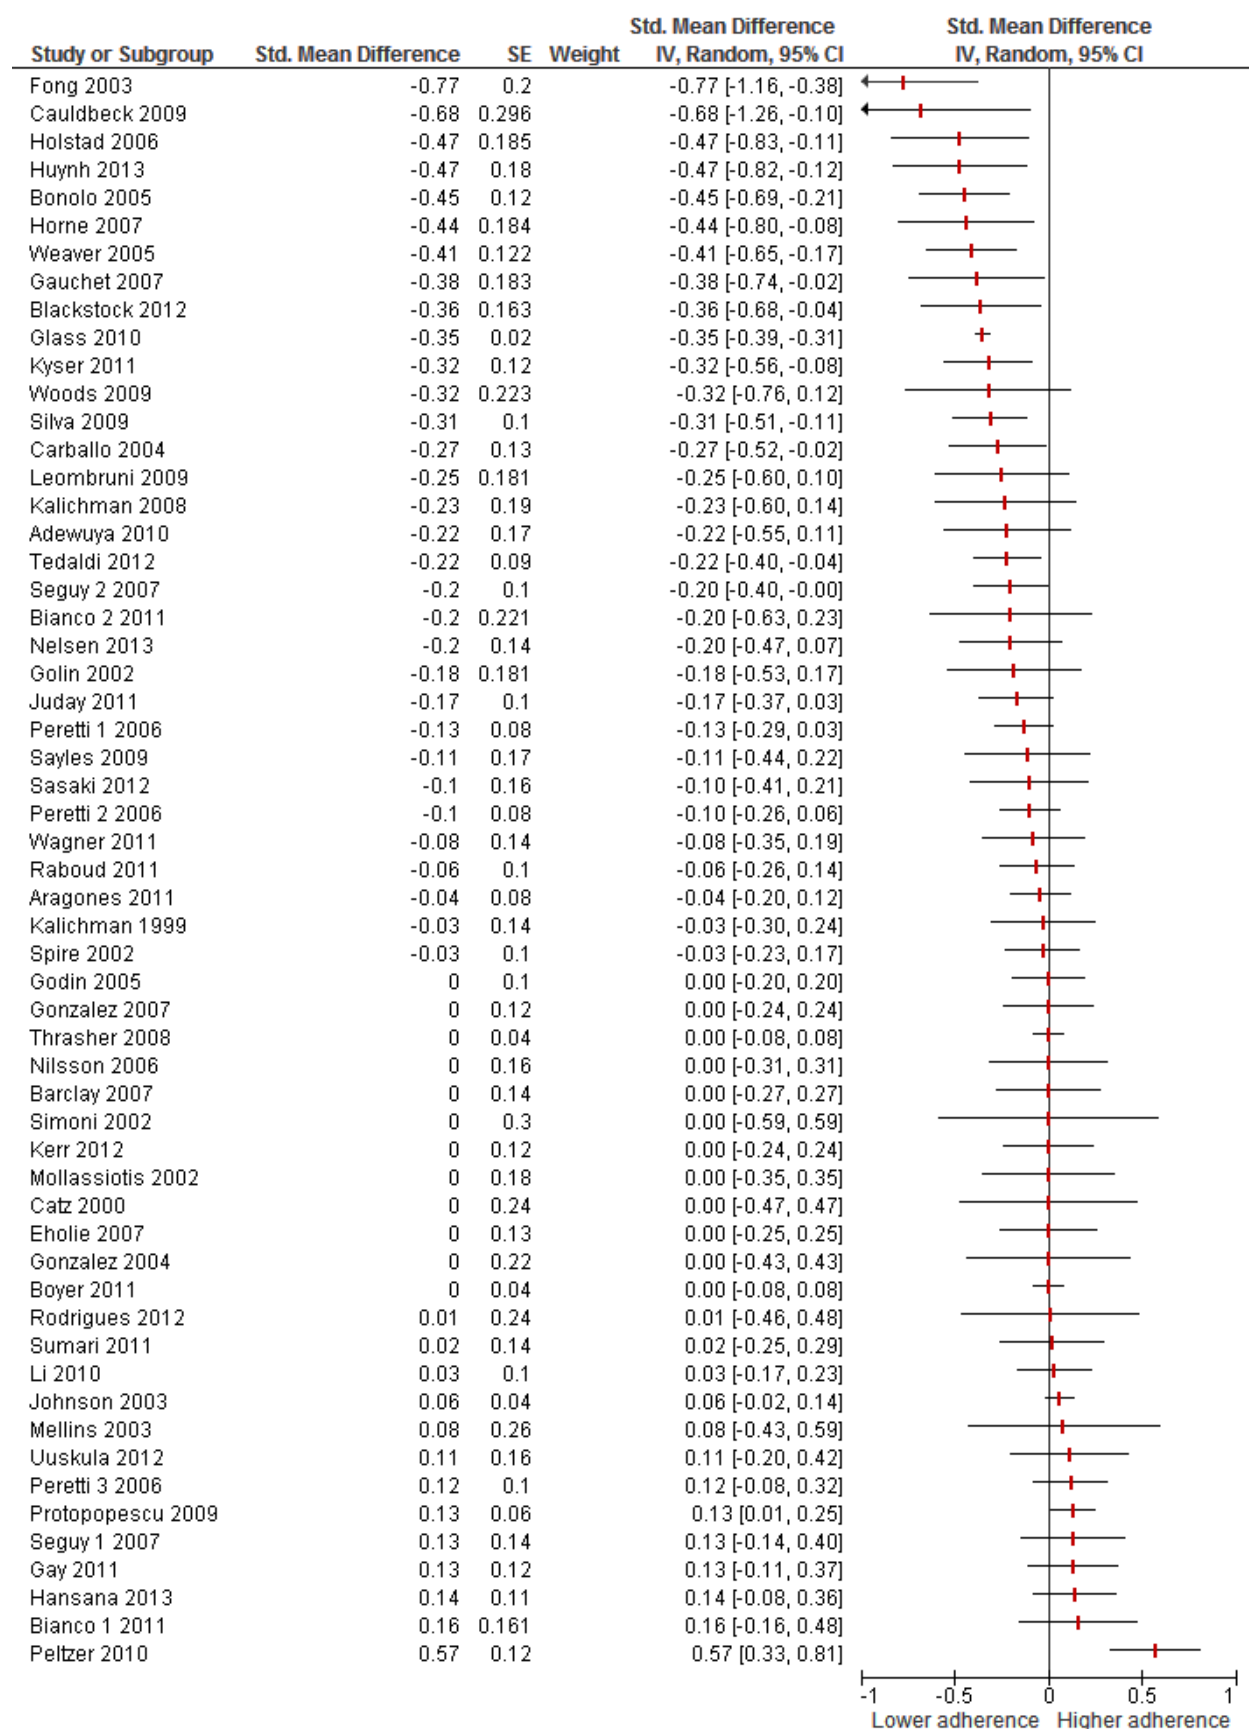

## CD4 cell count

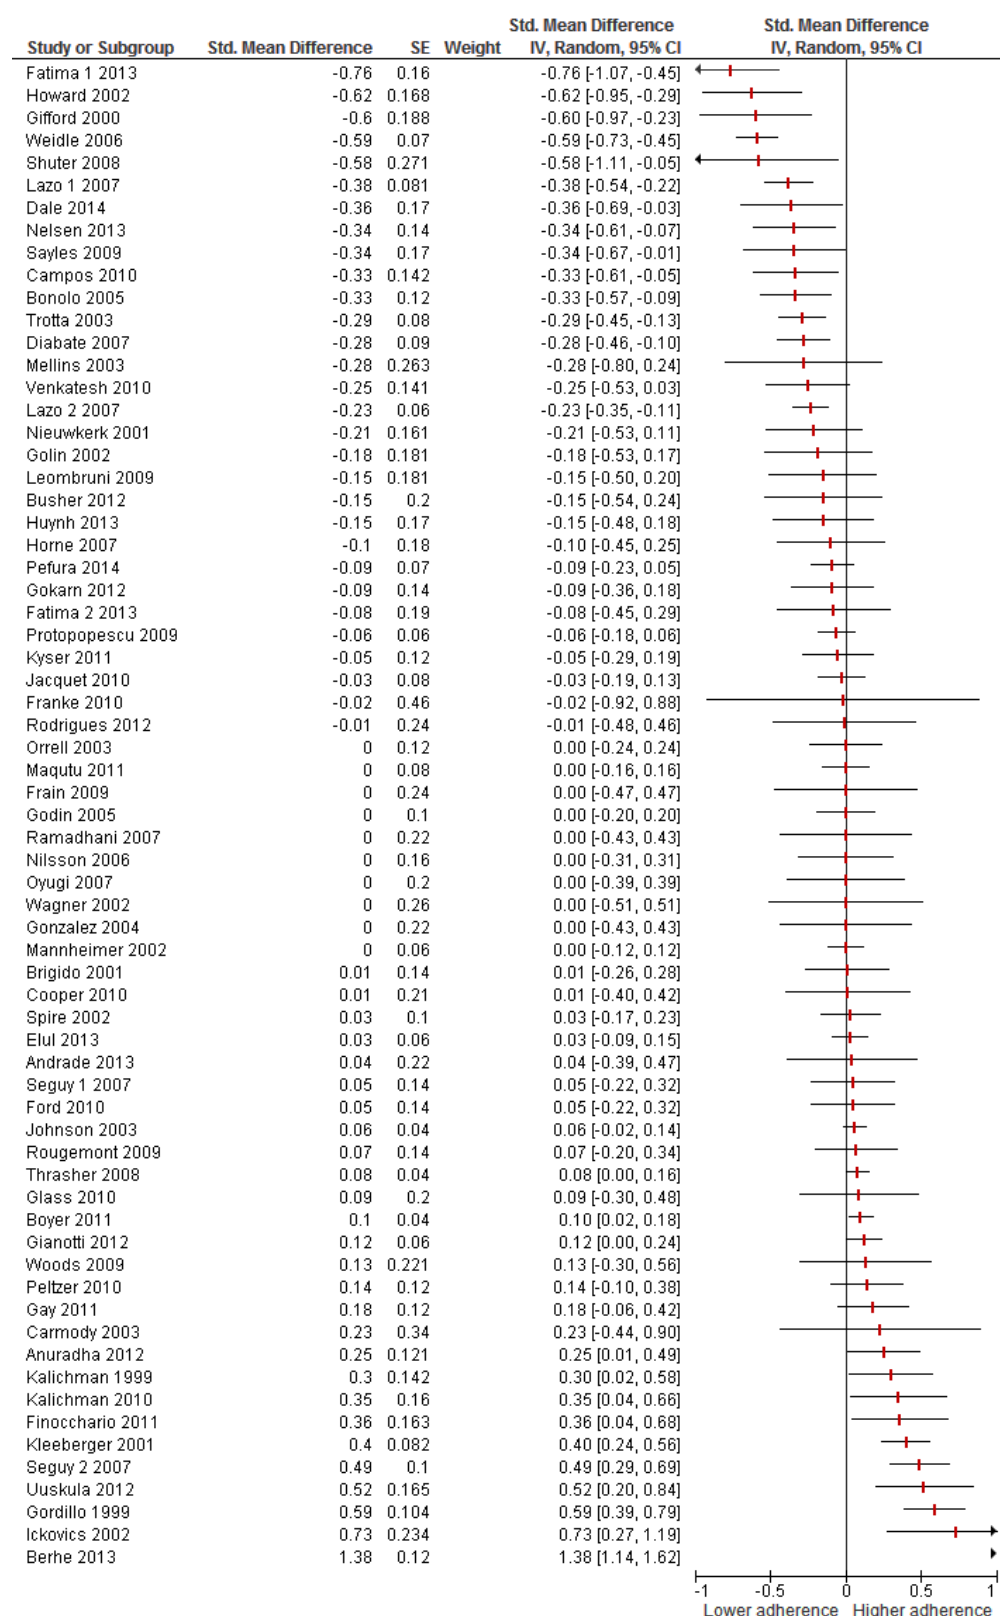

## Male gender

| Study or Subgroup | Std. Mean Difference | SE    | Weight | Std. Mean Difference |                    | Std. Mean Difference |
|-------------------|----------------------|-------|--------|----------------------|--------------------|----------------------|
|                   |                      |       |        | IV, Random, 95% CI   | IV, Random, 95% CI |                      |
| Ramadhani 2007    | -1.99                | 0.25  |        | -1.99 [-2.48, -1.50] |                    |                      |
| Woods 2009        | -0.73                | 0.234 |        | -0.73 [-1.19, -0.27] |                    |                      |
| Busher 2012       | -0.62                | 0.21  |        | -0.62 [-1.03, -0.21] |                    |                      |
| Tedaldi 2012      | -0.58                | 0.09  |        | -0.58 [-0.76, -0.40] |                    |                      |
| Sasaki 2012       | -0.47                | 0.16  |        | -0.47 [-0.78, -0.16] |                    |                      |
| Gauchet 2007      | -0.45                | 0.184 |        | -0.45 [-0.81, -0.09] |                    |                      |
| Fong 2003         | -0.43                | 0.2   |        | -0.43 [-0.82, -0.04] |                    |                      |
| Finnocchario 2011 | -0.38                | 0.163 |        | -0.38 [-0.70, -0.06] |                    |                      |
| Weidle 2006       | -0.35                | 0.06  |        | -0.35 [-0.47, -0.23] |                    |                      |
| Nelsen 2013       | -0.35                | 0.14  |        | -0.35 [-0.62, -0.08] |                    |                      |
| Ladefoged 2012    | -0.34                | 0.32  |        | -0.34 [-0.97, 0.29]  |                    |                      |
| Rougemont 2009    | -0.33                | 0.142 |        | -0.33 [-0.61, -0.05] |                    |                      |
| King 2012         | -0.3                 | 0.11  |        | -0.30 [-0.52, -0.08] |                    |                      |
| Bell 2007         | -0.28                | 0.263 |        | -0.28 [-0.80, 0.24]  |                    |                      |
| Pinheiro 2002     | -0.28                | 0.141 |        | -0.28 [-0.56, -0.00] |                    |                      |
| Poquette 2013     | -0.26                | 0.25  |        | -0.26 [-0.75, 0.23]  |                    |                      |
| Kamau 2011        | -0.25                | 0.101 |        | -0.25 [-0.45, -0.05] |                    |                      |
| Adewuya 2010      | -0.24                | 0.17  |        | -0.24 [-0.57, 0.09]  |                    |                      |
| Negash 2013       | -0.22                | 0.12  |        | -0.22 [-0.46, 0.02]  |                    |                      |
| Cooper 2010       | -0.21                | 0.22  |        | -0.21 [-0.64, 0.22]  |                    |                      |
| Protopopescu 2009 | -0.19                | 0.06  |        | -0.19 [-0.31, -0.07] |                    |                      |
| Gokarn 2012       | -0.18                | 0.14  |        | -0.18 [-0.45, 0.09]  |                    |                      |
| Shuter 2008       | -0.18                | 0.261 |        | -0.18 [-0.69, 0.33]  |                    |                      |
| Blackstock 2012   | -0.18                | 0.161 |        | -0.18 [-0.50, 0.14]  |                    |                      |
| Brigido 2001      | -0.17                | 0.141 |        | -0.17 [-0.45, 0.11]  |                    |                      |
| Dortz 2003        | -0.17                | 0.3   |        | -0.17 [-0.76, 0.42]  |                    |                      |
| Uuskula 2012      | -0.16                | 0.161 |        | -0.16 [-0.48, 0.16]  |                    |                      |
| Venkatesh 2010    | -0.14                | 0.14  |        | -0.14 [-0.41, 0.13]  |                    |                      |
| Boyer 2011        | -0.13                | 0.04  |        | -0.13 [-0.21, -0.05] |                    |                      |
| Pefura 2013       | -0.11                | 0.07  |        | -0.11 [-0.25, 0.03]  |                    |                      |
| Juday 2011        | -0.1                 | 0.1   |        | -0.10 [-0.30, 0.10]  |                    |                      |
| Graham 2007       | -0.09                | 0.21  |        | -0.09 [-0.50, 0.32]  |                    |                      |
| Seguy 1 2007      | -0.09                | 0.14  |        | -0.09 [-0.36, 0.18]  |                    |                      |
| Ford 2010         | -0.08                | 0.14  |        | -0.08 [-0.35, 0.19]  |                    |                      |
| Garcia 2009       | -0.08                | 0.14  |        | -0.08 [-0.35, 0.19]  |                    |                      |
| Mugavero 2009     | -0.07                | 0.12  |        | -0.07 [-0.31, 0.17]  |                    |                      |
| Etienne 2010      | -0.07                | 0.07  |        | -0.07 [-0.21, 0.07]  |                    |                      |
| Kalichman 2010    | -0.07                | 0.14  |        | -0.07 [-0.34, 0.20]  |                    |                      |
| Li 2010           | -0.04                | 0.1   |        | -0.04 [-0.24, 0.16]  |                    |                      |
| Pratt 2001        | -0.03                | 0.12  |        | -0.03 [-0.27, 0.21]  |                    |                      |
| Jacquet 2010      | -0.02                | 0.08  |        | -0.02 [-0.18, 0.14]  |                    |                      |
| Parruti 2006      | -0.02                | 0.16  |        | -0.02 [-0.33, 0.29]  |                    |                      |
| Orell 2003        | 0                    | 0.12  |        | 0.00 [-0.24, 0.24]   |                    |                      |
| Giday 2010        | 0                    | 0.14  |        | 0.00 [-0.27, 0.27]   |                    |                      |
| Silva 2009        | 0                    | 0.1   |        | 0.00 [-0.20, 0.20]   |                    |                      |
| Remien 2007       | 0                    | 0.2   |        | 0.00 [-0.39, 0.39]   |                    |                      |
| Barclay 2007      | 0                    | 0.14  |        | 0.00 [-0.27, 0.27]   |                    |                      |
| Gonzalez 2004     | 0                    | 0.22  |        | 0.00 [-0.43, 0.43]   |                    |                      |
| Murphy 2004       | 0                    | 0.19  |        | 0.00 [-0.37, 0.37]   |                    |                      |
| Mathews 2002      | 0                    | 0.16  |        | 0.00 [-0.31, 0.31]   |                    |                      |
| Seguy 2 2007      | 0                    | 0.1   |        | 0.00 [-0.20, 0.20]   |                    |                      |
| Do 2010           | 0                    | 0.15  |        | 0.00 [-0.29, 0.29]   |                    |                      |
| Eholie 2007       | 0                    | 0.13  |        | 0.00 [-0.25, 0.25]   |                    |                      |
| Wang 2007         | 0                    | 0.19  |        | 0.00 [-0.37, 0.37]   |                    |                      |
| Haubrich 1999     | 0                    | 0.16  |        | 0.00 [-0.31, 0.31]   |                    |                      |
| Power 2003        | 0                    | 0.27  |        | 0.00 [-0.53, 0.53]   |                    |                      |
| Murri 2001        | 0                    | 0.18  |        | 0.00 [-0.35, 0.35]   |                    |                      |
| Nilsson 2006      | 0                    | 0.16  |        | 0.00 [-0.31, 0.31]   |                    |                      |
| Safren 2005       | 0                    | 0.13  |        | 0.00 [-0.25, 0.25]   |                    |                      |
| Catz 2000         | 0                    | 0.24  |        | 0.00 [-0.47, 0.47]   |                    |                      |
| Heckman 2004      | 0                    | 0.12  |        | 0.00 [-0.24, 0.24]   |                    |                      |
| Holzemer 1999     | 0                    | 0.1   |        | 0.00 [-0.20, 0.20]   |                    |                      |
| Oyugi 2007        | 0                    | 0.2   |        | 0.00 [-0.39, 0.39]   |                    |                      |
| Mannheimer 2002   | 0                    | 0.06  |        | 0.00 [-0.12, 0.12]   |                    |                      |
| Simoni 2002       | 0                    | 0.3   |        | 0.00 [-0.59, 0.59]   |                    |                      |
| Kerr 2012         | 0                    | 0.12  |        | 0.00 [-0.24, 0.24]   |                    |                      |
| Ingersoll 2004    | 0                    | 0.18  |        | 0.00 [-0.35, 0.35]   |                    |                      |
| Mollasiotis 2002  | 0                    | 0.18  |        | 0.00 [-0.35, 0.35]   |                    |                      |

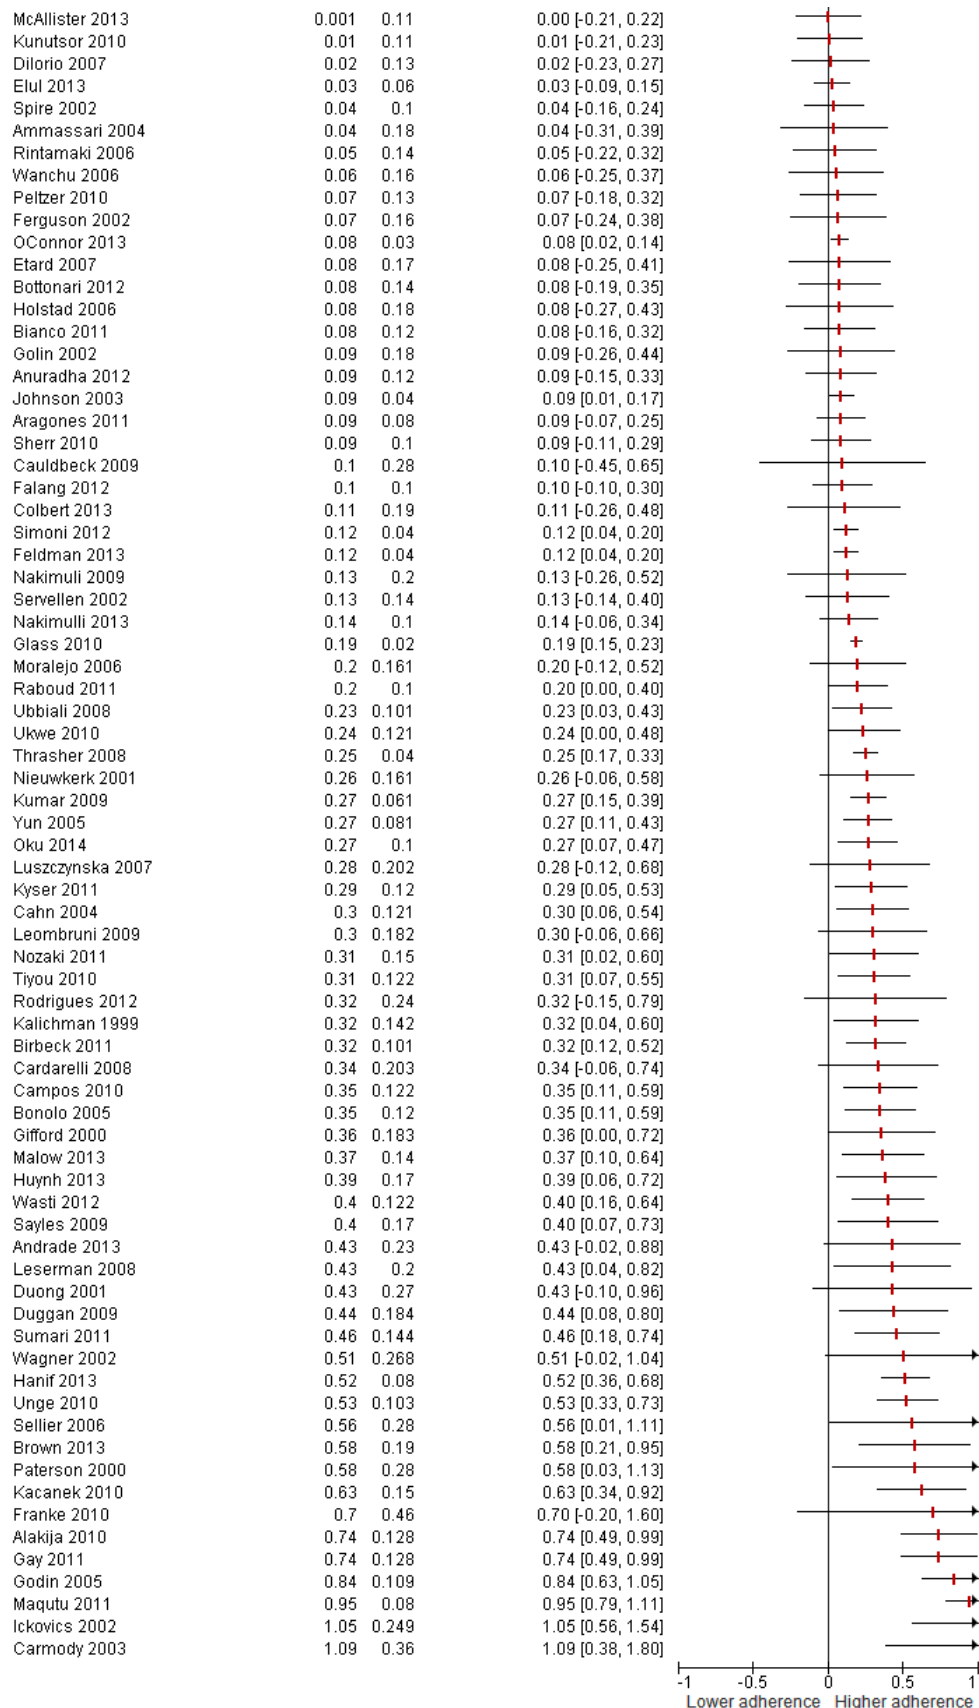

## Duration of ART

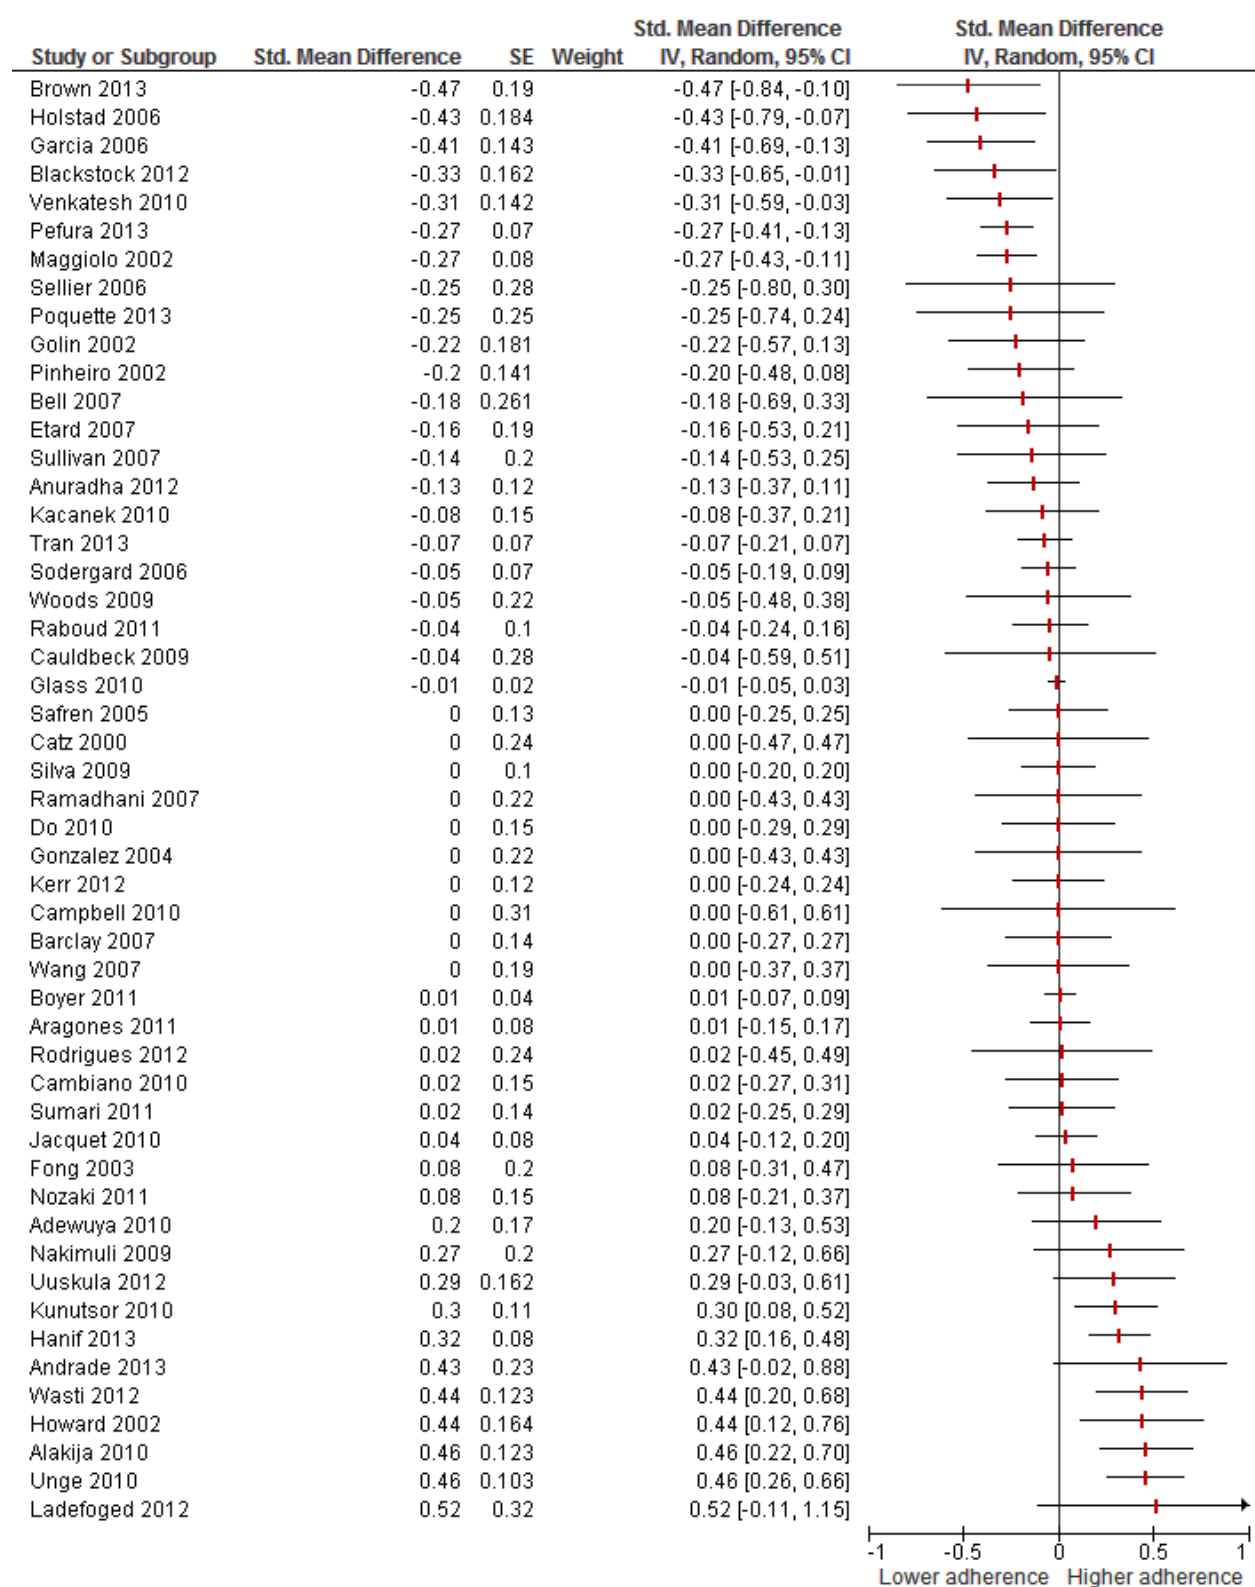

Supplement: Supplementary file 2 — Additional file 2: Forest plots of individual studies examining predictors/correlates.(PDF 432 KB) [file 12916_2014_142_MOESM2_ESM.pdf]
