# Supplementary material for: Predictors and correlates of adherence to combination antiretroviral therapy (ART) for chronic HIV infection: a meta-analysis
Source: PubMed Central journal article supplement (PMC4148019; doi:10.1186/s12916-014-0142-1), 2014-08-21
Supplement: 12916_2014_142_MOESM3_ESM.pdf [file 12916_2014_142_MOESM3_ESM.pdf]

|                      | 1 | 2 | 3 | 4 | 5 | 6 | 7 | 8 | 9 | 10 | 11 | 12 | 13 | 14 | 15 | 16 | 17 | 18 | 19 | 20 | 21 | 22 |   |
|----------------------|---|---|---|---|---|---|---|---|---|----|----|----|----|----|----|----|----|----|----|----|----|----|---|
| <i>Weidle 2006</i>   | √ | √ | - | √ | √ | √ | - | - | - | -  | √  | √  | √  | -  | √  | √  | √  | -  | -  | √  | √  | √  |   |
| <i>Willard 2006</i>  | √ | √ | √ | √ | - | - | √ | √ | - | -  | √  | √  | √  | √  | √  | √  | √  | √  | -  | -  | -  | -  |   |
| <i>Woods 2008</i>    | √ | √ | √ | - | - | - | √ | √ | - | -  | √  | √  | √  | √  | √  | √  | √  | -  | √  | √  | -  | √  |   |
| <i>Woods 2009</i>    | √ | √ | √ | - | √ | √ | √ | √ | - | -  | -  | -  | √  | -  | √  | √  | √  | √  | √  | √  | √  | -  | √ |
| <i>Woodward 2012</i> | √ | √ | √ | √ | √ | √ | √ | √ | - | -  | √  | √  | √  | √  | √  | √  | √  | √  | √  | √  | √  | √  | √ |
| <i>Yun 2005</i>      | √ | √ | √ | √ | √ | - | √ | √ | √ | √  | -  | -  | √  | -  | -  | -  | -  | -  | -  | -  | -  | -  | - |

1)Title/abstract: Introduction 2) Background/rationale 3) Objectives; Methods 4) Study design 5) Setting 6) Inclusion/exclusion criteria 7) Variables 8) Data sources 9) Bias 10) Study size 11) Quantitative variables 12) Statistical; Results 13) Participants 14) Descriptive data 15) Outcome data 16) Main results 17) Other analyses; Discussion 18) Key results 19) Limitations 20) Interpretation 21) Generalizability; Other information 22) Funding

√ = Good description; - = Incomplete/No description;
