# Supplementary material for: Predictors and correlates of adherence to combination antiretroviral therapy (ART) for chronic HIV infection: a meta-analysis
Source: BMC Med. 2014 Aug 21;12:142. doi: 10.1186/s12916-014-0142-1 (PMC4148019; doi:10.1186/s12916-014-0142-1)
Supplement: Supplementary file 1 — Additional file 1: Characteristics of included studies.(PDF 121 KB) [file 12916_2014_142_MOESM1_ESM.pdf]

### Additional file 1: Characteristics of included studies

| Reference             | N    | Country  | HDI | Treatment status | Adherence assessment method | Predictor/correlate | Factors                                                                                                                                                                                        |
|-----------------------|------|----------|-----|------------------|-----------------------------|---------------------|------------------------------------------------------------------------------------------------------------------------------------------------------------------------------------------------|
| Adewuya 2010 (16)     | 182  | Nigeria  | .42 | on cART          | Self-report                 | correlate           | Age, Male gender, Financial constraints<br>Social support, Time since HIV diagnosis<br>Duration of cART                                                                                        |
| Alakija 2010 (17)     | 253  | Nigeria  | .51 | on cART          | Self-report                 | correlate           | Age, Male gender, Duration of cART, Financial constraints                                                                                                                                      |
| Amberbir 2008 (18)    | 383  | Ethiopia | .41 | start            | Self-report                 | correlate           | Depressive symptoms, Social support                                                                                                                                                            |
| Andrade 2003 (19)     | 80   | USA      | .93 | on cART          | Pharmacy refill             | correlate           | Age, Male gender, Current substance use, CD4 cell count, depressive symptoms, duration of cART                                                                                                 |
| Ammasari 2004 (20)    | 135  | Italy    | .93 | on cART          | Self-report                 | correlate           | Age, Male gender, Current substance use, Financial constraints, Depressive symptoms                                                                                                            |
| Anuradha 2011 (21)    | 250  | India    | .55 | on cART          | Pharmacy refill             | correlate           | Age, Male gender, Current substance use<br>Social Support, Adherence Self Efficacy<br>Duration of cART, CD4 count, Financial Constraints, Depressive Symptoms                                  |
| Aragones 2011 (22)    | 847  | Cuba     | .78 | on cART          | Self-report                 | correlate           | Age, Male gender, Time since HIV diagnosis<br>Duration of cART, Pill burden, Daily dosing frequency, Trust/satisfaction health care provider, Self efficacy                                    |
| Arrivillaga 2009 (23) | 269  | Colombia | .69 | on cART          | Self-report                 | correlate           | Financial constraints                                                                                                                                                                          |
| Babson 2013 (24)      | 129  | USA      | .91 | on cART          | Pill count                  | correlate           | Current substance use                                                                                                                                                                          |
| Barclay 2007 (25)     | 185  | USA      | .96 | on cART          | Electronic monitoring       | predictor           | Male gender, Time since HIV diagnosis, Current substance use, Social Support, Adherence Self Efficacy, Necessity/Utility of cART, Duration of cART, Financial Constraints, Depressive Symptoms |
| Beach 2005 (26)       | 2338 | USA      | .95 | on cART          | Self-report                 | correlate           | Trust/satisfaction health care provider                                                                                                                                                        |
| Bell 2007 (27)        | 59   | Malawi   | .44 | on cART          | Electronic monitoring       | predictor           | Male gender, Duration of cART                                                                                                                                                                  |
| Berhe 2012 (28)       | 348  | Ethiopia | .36 | on cART          | Self-report                 | correlate           | HIV stigma, Social support, depressive symptoms, current substance use, financial constraints, CD4 cell count.                                                                                 |
| Bianco 2010 (29)      | 242  | USA      | .91 | on cART          | Self-report                 | correlate           | Age, Male gender, Time since HIV diagnosis, Social Support, Financial Constraints, Depressive Symptoms                                                                                         |
| Birbeck 2011 (30)     | 488  | Zambia   | .47 | Start/switch     | Pharmacy refill             | predictor           | Age, Male gender, HIV Stigma, Financial Constraints                                                                                                                                            |

| Reference            | N    | Country                                            | HDI | Treatment status | Adherence assessment method | Predictor/correlate | Factors                                                                                                                                                                           |
|----------------------|------|----------------------------------------------------|-----|------------------|-----------------------------|---------------------|-----------------------------------------------------------------------------------------------------------------------------------------------------------------------------------|
| Blackstock 2012 (31) | 175  | USA                                                | .90 | on cART          | Self-report                 | correlate           | Age, Male gender , Trust/Satisfaction with health care provider, Time since HIV diagnosis, Current substance use, Duration of cART, Daily dosing frequency, Financial Constraints |
| Boarts 2006 (32)     | 57   | USA                                                | .96 | on cART          | Self-report                 | predictor           | Age, Depressive symptoms                                                                                                                                                          |
| De Boer 2008 (33)    | 391  | Netherlands                                        | .94 | on cART          | Self-report                 | correlate           | Necessity/utility cART, Concerns cART                                                                                                                                             |
| Bonolo 2005 (34)     | 306  | Brazil                                             | .81 | on cART          | Self-report                 | correlate           | Male gender, Financial constraints, HIV stigma<br>Concurrent substance use, Pill burden, CD4 cell count, Time since HIV diagnosis                                                 |
| Bottonari 2012 (35)  | 192  | USA                                                | .90 | on cART          | Self-report                 | correlate           | Age, Male gender, Current substance use, Financial Constraints, Depressive Symptoms                                                                                               |
| Boyer 2011 (36)      | 2117 | Cameroon                                           | .52 | on cART          | Self-report                 | correlate           | Age, Male gender, Time since HIV diagnosis, Current substance use, HIV Stigma, Social Support, Duration of cART, CD4 cell count, Financial Constraints                            |
| Brigido 2001 (37)    | 182  | Brasil                                             | .78 | on cART          | Self-report                 | correlate           | Age, Male gender, CD4 cell count, Financial Constraints                                                                                                                           |
| Brown 2013 (38)      | 116  | USA                                                | .91 | on cART          | Self-report                 | correlate           | Age, Male gender, Financial constraints, duration of cART, Pill burden, Adherence self efficacy, Necessity/utility cART                                                           |
| Busher 2012 (39)     | 99   | USA                                                | .91 | Start/switch     | Self-report                 | predicto            | Male gender, Pill burden, Dosing frequency, CD4 cell count, Financial constraints                                                                                                 |
| Cahn 2004 (40)       | 315  | Argentina, Italy, Brazil, Canada, Thailand, Mexico | .80 | Start/switch     | Self-report                 | predictor           | Age, Pill Burden, PI containing regimen, Daily dosing frequency                                                                                                                   |
| Cambiano 2010 (41)   | 2060 | UK                                                 | .86 | on cART          | Pharmacy refill             | predictor           | Age, Duration of cART                                                                                                                                                             |
| Campbell 2010 (42)   | 122  | Guatamala                                          | .56 | on cART          | Pharmacy refill             | correlate           | Duration of cART, Pill burden                                                                                                                                                     |
| Campos 2010 (43)     | 293  | Brasil                                             | .78 | Start/switch     | Self-report                 | predictor           | Age, Male gender, Current substance use, CD4 cell count, Financial Constraints, Depressive Symptoms                                                                               |
| Carballo 2004 (44)   | 235  | Spain                                              | .95 | on cART          | Self-report                 | correlate           | Age, Financial constraints, Time since HIV diagnosis, Pill burden                                                                                                                 |
| Cardarelli 2008 (45) | 103  | USA                                                | .91 | on cART          | Self-report                 | correlate           | Age, Male gender, Current substance use, HIV Stigma, Social Support, Pill Burden, Depressive Symptoms                                                                             |
| Carmody 2003 (46)    | 67   | Brasil                                             | .79 | on cART          | Pharmacy refill             | correlate           | Age, Male gender, CD4 cell count, Pill burden                                                                                                                                     |

| Reference          | N    | Country                                            | HDI | Treatment status | Adherence assessment method | Predictor/correlate | Factors                                                                                                                                                                               |
|--------------------|------|----------------------------------------------------|-----|------------------|-----------------------------|---------------------|---------------------------------------------------------------------------------------------------------------------------------------------------------------------------------------|
| Catz 2000 (47)     | 72   | USA                                                | .93 | on cART          | Self-report                 | correlate           | Age, Male gender, Time since HIV diagnosis, Current substance use, Social Support, Adherence Self Efficacy, Pill Burden, Duration of cART, Financial Constraints, Depressive Symptoms |
| Caulbeck 2009 (48) | 53   | India                                              | .60 | on cART          | Self-report                 | correlate           | Age, Male gender , Time since HIV diagnosis Pill Burden, Duration of cART, Financial Constraints                                                                                      |
| Cha 2008 (49)      | 215  | USA                                                | .91 | on cART          | Self-report                 | correlate           | Depressive symptoms, Adherence self efficacy, Social support                                                                                                                          |
| Chesney 2000 (50)  | 75   | USA                                                | .94 | on cART          | Self-report                 | correlate           | Current substance use, Depressive Symptoms Financial Constraints, Social Support, Adherence Self Efficacy                                                                             |
| Colbert 2013 (51)  | 302  | USA                                                | .93 | on cART          | Electronic monitoring       | predictor           | Age, male gender, Financial constraints, Adherence self efficacy, Pill burden                                                                                                         |
| Cooper 2010 (52)   | 87   | UK                                                 | .85 | Start/switch     | Electronic monitoring       | predictor           | Age, Male gender, Daily dosing frequency, CD4 cell count, Necessity/utility cART, Concerns about cART                                                                                 |
| Cooper 2011 (53)   | 234  | UK                                                 | .86 | Start/switch     | Self-report                 | predictor           | Necessity/utility cART, Concerns about cART                                                                                                                                           |
| Corless 2013 (54)  | 1571 | USA                                                | .93 | on cART          | Self-report                 | correlate           | Trust/satisfaction health care provider                                                                                                                                               |
| Dale 2014 (55)     | 138  | USA                                                | .91 | on cART          | Self-report                 | correlate           | CD4 cell count                                                                                                                                                                        |
| Diabate (56)       | 591  | Cote d'Ivoire                                      | .48 | on cART          | Self-report                 | predictor           | Age, Social support, Pill burden, CD4 cell count                                                                                                                                      |
| Dlamini 2009 (58)  | 698  | Lesotho, Malawi, South Africa, Swaziland, Tanzania | .48 | on cART          | Self-report                 | predictor           | HIV stigma                                                                                                                                                                            |
| Dilorio 2007 (57)  | 236  | USA                                                | .96 | on cART          | Self-report                 | correlate           | Age, Male gender, Financial constraints, Adherence self-efficacy, Depressive symptoms Social support, HIV stigma, Trust/satisfaction health care provider                             |
| Do 2010 (59)       | 300  | Botswana                                           | .63 | on cART          | Self-report                 | correlate           | Age, Male gender, Financial constraints Duration of cART, Pill burden, Depressive symptoms, Concurrent substance use, HIV stigma                                                      |
| Dorz 2003 (60)     | 109  | Italy                                              | .93 | on cART          | Self-report                 | correlate           | Age, Male gender, Financial constraints                                                                                                                                               |
| Duggan 2009 (61)   | 129  | USA                                                | .91 | on cART          | Self-report                 | correlate           | Age, Male gender, Financial Constraints                                                                                                                                               |

| Reference               | N    | Country                                | HDI | Treatment status | Adherence assessment method | Predictor/correlate | Factors                                                                                                                                                                                     |
|-------------------------|------|----------------------------------------|-----|------------------|-----------------------------|---------------------|---------------------------------------------------------------------------------------------------------------------------------------------------------------------------------------------|
| Duong 2001 (62)         | 149  |                                        | .94 | on cART          | Self-report                 | correlate           | Age, Male gender, Necessity/Utility of cART, Adherence self efficacy, Social support                                                                                                        |
| Durante 2003 (63)       | 63   | USA                                    | .94 | on cART          | Self-report                 | correlate           | Trust/Satisfaction with health care provider, HIV Stigma, Social Support                                                                                                                    |
| Eholie 2007 (64)        | 308  | Cote d'Ivoire                          | .48 | on cART          | Self-report                 | correlate           | Age, Male gender, Financial constraint, Time since HIV diagnosis, PI containing regimen                                                                                                     |
| Elul 2013 (65)          | 1408 | Rwanda                                 | .45 | on cART          | Self-report                 | correlate           | Male gender, Financial constraints, CD4 cell count, Current substance use.                                                                                                                  |
| Etard 2007 (66)         | 158  | Senegal                                | .46 | Start/switch     | Pharmacy refill             | predictor           | Age, Male gender, Duration of cART PI containing regimen                                                                                                                                    |
| Etienne 2010 (67)       | 921  | Kenya, Uganda, Zambia, Nigeria, Rwanda | .42 | on cART          | Self-report                 | correlate           | Male gender, Concurrent substance use, Depressive symptoms                                                                                                                                  |
| Ettenhofer 2009 (68)    | 431  | USA                                    | .95 | on cART          | Electronic monitoring       | predictor           | Age                                                                                                                                                                                         |
| Falang 2012 (69)        | 461  | Nigeria                                | .45 | on cART          | Self-report                 | correlate           | Age, Male gender, Current substance use, HIV Stigma, Pill Burden, Daily dosing frequency, Financial Constraints                                                                             |
| Farley 2010 (70)        | 222  | Nigeria                                | .51 | on cART          | Pharmacy refill             | correlate           | Depressive Symptoms                                                                                                                                                                         |
| Fatima 2013 (71)        | 199  | Brasil                                 | .78 | Start/switch     | Self-report                 | predictor           | Age, Financial constraints, HIV stigma, Current substance use, Pill burden, CD4 cell count, Depressive symptoms                                                                             |
| Feldman 2013 (72)       | 2399 | USA                                    | .95 | on cART          | Self-report                 | correlate           | Age, Male gender, Depressive symptoms                                                                                                                                                       |
| Ferguson 2002 (73)      | 149  | USA                                    | .94 | on cART          | Self-report                 | predictor           | Male gender, Social Support                                                                                                                                                                 |
| Finnoccharion 2011 (74) | 168  | USA                                    | .95 | on cART          | Electronic monitoring       | predictor           | Age, Male gender, Current substance use, Social Support, Adherence Self Efficacy, PI containing regimen, Daily dosing frequency, CD4 cell count, Financial Constraints, Depressive Symptoms |
| Fong 2003 (75)          | 161  | Hong Kong                              | .92 | on cART          | Self-report                 | correlate           | Age, Male gender, Time since HIV diagnosis, Duration of cART, Daily dosing frequency, PI containing regimen, Pill burden, HIV stigma                                                        |
| Ford 2010 (76)          | 207  | South Africa                           | .67 | Start/switch     | Self-report                 | correlate           | Age, Male gender, CD4 cell count                                                                                                                                                            |
| Frain 2009 (77)         | 75   | USA                                    | .91 | on cART          | Self-report                 | correlate           | Trust/Satisfaction with health care provider, HIV Stigma, Concerns about cART, CD4 cell count, Financial Constraints                                                                        |

| Reference          | N    | Country     | HDI | Treatment status | Adherence assessment method | Predictor/correlate | Factors                                                                                                                                                                                                                       |
|--------------------|------|-------------|-----|------------------|-----------------------------|---------------------|-------------------------------------------------------------------------------------------------------------------------------------------------------------------------------------------------------------------------------|
| Franke 2010 (78)   | 134  | Peru        | .72 | Start/switch     | Self-report                 | predictor           | Age, Male gender, CD4 cell count, Financial constraints, Depressive symptoms, Social support, HIV stigma, Adherence self efficacy                                                                                             |
| Garcia 2006 (81)   | 182  | Brazil      | .81 | on cART          | Self-report                 | correlate           | Age, Male gender, Social Support, Duration of cART, Financial Constraints                                                                                                                                                     |
| Gauchet 2007 (82)  | 122  | France      | .93 | on cART          | Self-report                 | correlate           | Age, Male gender , Trust/Satisfaction with health care provider, Time since HIV diagnosis, Pill Burden, Necessity/Utility of cART, Concerns about cART                                                                        |
| Gao 2000 (80)      | 72   | USA         | .94 | on cART          | Self-report                 | correlate           | Age, Daily dosing frequency, Financial Constraints                                                                                                                                                                            |
| Gay 2011 (83)      | 302  | USA         | .95 | on cART          | Self-report                 | correlate           | Age, Male gender, Time since HIV diagnosis, Pill Burden, PI containing regimen, CD4 cell count, Financial Constraints                                                                                                         |
| Gionotti 2012 (84) | 2114 | Italy       | .87 | on cART          | Self-report                 | correlate           | Age, CD4 cell count, Pill burden, Daily dosing frequency                                                                                                                                                                      |
| Gibbie 2007 (85)   | 72   | Australia   | .96 | on cART          | Self-report                 | correlate           | Age, Social Support, Financial Constraints, Depressive Symptoms                                                                                                                                                               |
| Giday 2010 (86)    | 510  | Ethiopia    | .33 | on cART          | Self-report                 | correlate           | Age, Male gender, Financial constraints, HIV stigma, Social support                                                                                                                                                           |
| Gifford 2000 (87)  | 133  | USA         | .93 | on cART          | Self-report                 | correlate           | Age, Male gender, Social Support, Adherence Self Efficacy, Pill Burden, Daily dosing frequency, CD4 cell count, Depressive Symptoms                                                                                           |
| Glass 2010 (88)    | 5664 | Switzerland | .95 | on cART          | Self-report                 | predictor           | Age, Male gender, Social Support, PI containing regimen, CD4 cell count                                                                                                                                                       |
| Godin 2005 (89)    | 376  | Canada      | .96 | on cART          | Self-report                 | predictor           | Age, Male gender, CD4 cell count, Trust/Satisfaction with health care provider, Time since HIV diagnosis, Social Support, Adherence Self Efficacy                                                                             |
| Gokarn 2012 (90)   | 300  | India       | .61 | on cART          | Self-report                 | correlate           | Age, Male gender, Financial constraints, CD4 cell count, HIV stigma,                                                                                                                                                          |
| Golin 2002 (91)    | 117  | USA         | .93 | on cART          | Electronic monitoring       | predictor           | Age, Male gender, Time since HIV diagnosis, Current substance use, Social Support, Adherence Self Efficacy, Pill Burden, Duration of cART, Daily dosing frequency, CD4 cell count, Financial Constraints, Depressive Symptoms |

| Reference           | N   | Country        | HDI | Treatment status | Adherence assessment method | Predictor/correlate | Factors                                                                                                                                                                      |
|---------------------|-----|----------------|-----|------------------|-----------------------------|---------------------|------------------------------------------------------------------------------------------------------------------------------------------------------------------------------|
| Gonzalez 2004 (92)  | 90  | USA            | .95 | on cART          | Self-report                 | correlate           | Age, Male gender, Time since HIV diagnosis, Current substance use, Social Support, Pill Burden, Duration of cART, CD4 cell count, Financial Constraints, Depressive Symptoms |
| Gonzalez 2007 (93)  | 325 | USA            | .93 | on cART          | Electronic monitoring       | predictor           | Age, Pill Burden, Necessity/Utility of cART, Concerns about cART, Financial Constraints, Depressive Symptoms                                                                 |
| Gordillo 1999 (94)  | 366 | Spain          | .89 | on cART          | Self-report                 | correlate           | Age, Social Support, CD4 cell count, Depressive Symptoms                                                                                                                     |
| Graham 2007 (95)    | 87  | USA            | .96 | on cART          | Pharmacy refill             | correlate           | Male gender, Financial constraints                                                                                                                                           |
| Hanif 2013 (96)     | 632 | Brasil         | .81 | on cART          | Self-report                 | Orrelate            | Male gender, Social support, Financial constraints, Depressive symptoms, duration of cART                                                                                    |
| Hansana 2013 (97)   | 346 | Laos           | .52 | on cART          | Self-report                 | orrelate            | Age, Time since HIV diagnosis                                                                                                                                                |
| Haubrich 1999 (98)  | 173 | USA            | .93 | on cART          | Self-report                 | predictor           | Age, Male gender, Trust/Satisfaction with health care provider, Current substance use                                                                                        |
| Heckman 2004 (99)   | 272 | USA            | .93 | on cART          | Self-report                 | correlate           | Age, Male gender, Trust/Satisfaction with health care provider, Current substance use Social Support, Financial Constraints, Depressive Symptoms                             |
| Holmes 2007 (100)   | 116 | USA            | .96 | on cART          | Electronic monitoring       | predictor           | Financial constraints, HIV stigma, Trust/satisfaction health care provider, Depressive symptoms, Social support                                                              |
| Holzemer 1999 (102) | 420 | USA            | .93 | on cART          | Self-report                 | correlate           | Age, Male gender, Social Support, Financial Constraints, Depressive Symptoms                                                                                                 |
| Horne 2007 (103)    | 117 | United Kingdom | .93 | on cART          | Self-report                 | predictor           | Age, Time since HIV diagnosis, Pill Burden Necessity/Utility of cART, Concerns about cART CD4 cell count, Depressive Symptoms                                                |
| Howard 2002 (104)   | 161 | USA            | .93 | on cART          | Electronic monitoring       | predictor           | Age, Current substance use, PI containing regimen, Duration of cART, Daily dosing frequency, CD4 cell count, Financial Constraints                                           |
| Huang 2013 (105)    | 199 | China          | .69 | on cART          | Self-report                 | correlate           | Adherence self efficacy                                                                                                                                                      |
| Huynh 2013 (106)    | 142 | USA            | .90 | on cART          | Self-report                 | correlate           | Male gender, Social support, Financial constraints, Time since HIV diagnosis, CD4 cell count.                                                                                |
| Ickovics 2002 (107) | 93  | USA            | .94 | Start/switch     | Self-report                 | predictor           | Age, Male gender, Current substance use, Adherence Self Efficacy, CD4 cell count, Financial Constraints, Depressive Symptoms                                                 |

| Reference             | N    | Country                    | HDI | Treatment status | Adherence assessment method | Predictor/correlate | Factors                                                                                                                                                                                                                                                               |
|-----------------------|------|----------------------------|-----|------------------|-----------------------------|---------------------|-----------------------------------------------------------------------------------------------------------------------------------------------------------------------------------------------------------------------------------------------------------------------|
| Ingersoll 2004 (108)  | 120  | USA                        | .95 | on cART          | Self-report                 | correlate           | Age, Male gender                                                                                                                                                                                                                                                      |
| Jacquet 2010 (109)    | 2065 | Benin, Cote d'Ivoire, Mali | .38 | on cART          | Self-report                 | correlate           | Age, Male gender, CD4 cell count<br>Duration of cART, Concurrent substance use                                                                                                                                                                                        |
| Johnson 2003 (110)    | 2765 | USA                        | .94 | on cART          | Self-report                 | correlate           | Age, Male gender, Time since HIV diagnosis,<br>Current substance use, Social Support, Pill Burden,<br>Daily dosing frequency, CD4 cell count, Financial Constraints,<br>Depressive Symptoms, Trust/Satisfaction with health care provider,<br>Adherence Self Efficacy |
| Johnson 2012 (111)    | 293  | USA                        | .90 | on cART          | Self-report                 | correlate           | Depressive symptoms, Necessity/ utility cART, concerns about cART                                                                                                                                                                                                     |
| Juday 2011 (112)      | 461  | USA                        | .96 | on cART          | Self-report                 | correlate           | Age, Male gender, Time since HIV diagnosis,<br>Current substance use, Pill Burden, Financial Constraints,<br>Depressive Symptoms                                                                                                                                      |
| Kacanek 2010 (113)    | 177  | USA                        | .91 | on cART          | Self-report                 | predictor           | Age, Male gender, Financial constraints,<br>Duration of cART, Concurrent substance use, Social support                                                                                                                                                                |
| Kalichman 1999 (114)  | 182  | USA                        | .93 | on cART          | Self-report                 | correlate           | Age, Male gender, CD4 cell count,<br>Trust/Satisfaction with health care provider, Time since HIV diagnosis,<br>Social Support, Financial Constraints                                                                                                                 |
| Kalichman 2003 (115)  | 255  | USA                        | .91 | on cART          | Self-report                 | correlate           | Depressive symptoms, Social support<br>Current substance use                                                                                                                                                                                                          |
| Kalichman 2008 (116)  | 145  | USA                        | .91 | on cART          | Unannounced pillcount       | predictor           | Age, Depressive symptoms, Social support<br>HIV stigma, Current substance use, Time since HIV diagnosis                                                                                                                                                               |
| Kalichman 2010 (117)  | 188  | USA                        | .91 | on cART          | Unannounced pillcount       | predictor           | Age, Male gender, CD4 cell count, Current substance use,<br>HIV Stigma, Financial Constraints, Depressive Symptoms                                                                                                                                                    |
| Kamau 2011 (118)      | 354  | Kenya                      | .50 | on cART          | Self-report                 | correlate           | Age, Male gender, Financial Constraints                                                                                                                                                                                                                               |
| Kerr 2012 (119)       | 288  | Thailand                   | .67 | on cART          | Self-report                 | correlate           | Age, Male gender, Time since HIV diagnosis,<br>Current substance use, Adherence Self Efficacy<br>Pill Burden, Duration of cART, Financial Constraints,<br>Depressive Symptoms                                                                                         |
| King 2012 (120)       | 326  | USA                        | .90 | on cART          | Self-report                 | correlate           | Age, male gender, Depressive symptoms,<br>Current substance use                                                                                                                                                                                                       |
| Kleeberger 2001 (121) | 539  | USA                        | .93 | on cART          | Self-report                 | correlate           | Age, Current substance use, Pill Burden, CD4 cell count,<br>Depressive Symptoms                                                                                                                                                                                       |

| Reference              | N    | Country      | HDI | Treatment status | Adherence assessment method | Predictor/correlate | Factors                                                                                                                                                                             |
|------------------------|------|--------------|-----|------------------|-----------------------------|---------------------|-------------------------------------------------------------------------------------------------------------------------------------------------------------------------------------|
| Kumar 2009 (122)       | 1192 | USA          | .93 | on cART          | Self-report                 | correlate           | Age, Male gender, Social Support, Financial Constraints, Depressive Symptoms                                                                                                        |
| Kunutsor 2010 (123)    | 967  | Uganda       | .42 | on cART          | Pill count                  | predictor           | Age, Male gender, Duration of cART                                                                                                                                                  |
| Kyser 2011 (124)       | 528  | USA          | .91 | on cART          | Self-report                 | correlate           | Age, Male gender, Financial constraints<br>CD4 cell count, Time since HIV diagnosis, PI containing regimen, Daily dosing frequency<br>Depressive symptoms, Concurrent substance use |
| Ladefoged 2012 (125)   | 46   | Greenland    | .96 | on cART          | Self-report                 | correlate           | Age, Male gender, duration of cART, Financial constraints, Social support, Current substance use                                                                                    |
| Lazo 2007 (126)        | 1944 | USA          | .93 | Start/switch     | Self-report                 | predictor           | Age, Current substance use, PI containing regimen, CD4 cell count, Financial Constraints, Depressive Symptoms                                                                       |
| Leombruni 2009 (127)   | 130  | Italy        | .87 | on cART          | Self-report                 | correlate           | Age, Male gender, Time since HIV diagnosis, CD4 cell count, Depressive Symptoms                                                                                                     |
| Leserman 2008 (128)    | 105  | USA          | .91 | on cART          | Self-report                 | correlate           | Age, Male gender, Financial constraints, Current substance use                                                                                                                      |
| Li 2010 (129)          | 386  | Thailand     | .78 | on cART          | Self-report                 | correlate           | Age, Male gender, Time since HIV diagnosis, HIV Stigma, Social Support, Financial Constraints, Depressive Symptoms                                                                  |
| Li 2011 (130)          | 202  | China        | .67 | on cART          | Self-report                 | correlate           | HIV Stigma, Adherence Self Efficacy                                                                                                                                                 |
| Luszczynska 2007 (131) | 104  | India        | .60 | on cART          | Self-report                 | correlate           | Age, Male gender, Social Support, Adherence Self Efficacy                                                                                                                           |
| Lyimo 2014 (132)       | 158  | Tanzania     | .47 | on cART          | Self-report                 | predictor           | Current substance use, HIV stigma                                                                                                                                                   |
| Lyman 2009 (133)       | 189  | USA          | .91 | Start/switch     | Electronic monitoring       | predictor           | Adherence Self Efficacy                                                                                                                                                             |
| Maggiolo 2002 (134)    | 597  | Italy        | .92 | on cART          | Self-report                 | correlate           | Daily dosing frequency, duration of cART, Pill burden                                                                                                                               |
| Malow 2013 (135)       | 194  | Haiti        | .45 | on cART          | Self-report                 | correlate           | Age, Male gender, Depressive symptoms, Necessity/utility cART, Concerns about cART                                                                                                  |
| Maqutu 2011 (136)      | 688  | South Africa | .62 | on cART          | Pill count                  | predictor           | Age, Male gender, CD4 cell count                                                                                                                                                    |
| Mannheimer 2002 (137)  | 1095 | USA          | .93 | on cART          | Self-report                 | predictor           | Age, Male gender, Pill Burden, PI containing regimen, CD4 cell count                                                                                                                |
| Mathews 2002 (138)     | 164  | USA          | .93 | on cART          | Electronic monitoring       | predictor           | Age, Male gender, Current substance use, Adherence Self Efficacy, Necessity/Utility of cART                                                                                         |
| McAllister 2013 (139)  | 335  | Australia    | .93 | on cART          | Self-report                 | correlate           | Age, Male gender, Financial constraints                                                                                                                                             |

| Reference                      | N    | Country      | HDI | Treatment status | Adherence assessment method | Predictor/correlate | Factors                                                                                                                                                                                                                                                                            |
|--------------------------------|------|--------------|-----|------------------|-----------------------------|---------------------|------------------------------------------------------------------------------------------------------------------------------------------------------------------------------------------------------------------------------------------------------------------------------------|
| McDonnell Holstad 2006 (102)   | 120  | USA          | .96 | on cART          | Self-report                 | correlate           | Male gender, Time since HIV diagnosis, Current substance use, Duration of cART, Financial Constraints                                                                                                                                                                              |
| Mellins 2003 (140)             | 62   | USA          | .93 | on cART          | Self-report                 | predictor           | Age, Time since HIV diagnosis, Current substance use, HIV Stigma, Adherence Self Efficacy, Pill Burden, CD4 cell count                                                                                                                                                             |
| Molassiotis 2002 (141)         | 139  | Hong Kong    | .90 | on cART          | Self-report                 | correlate           | Age, Male gender, Time since HIV diagnosis, Social Support, Adherence Self Efficacy, PI containing regimen, Daily dosing frequency, Depressive Symptoms                                                                                                                            |
| Moralejo 2006 (142)            | 143  | Spain        | .95 | on cART          | Pharmacy refill             | correlate           | Age, Male gender, Trust/Satisfaction with health care provider, Current substance use Adherence Self Efficacy, Depressive Symptoms                                                                                                                                                 |
| Mugavero 2009 (143)            | 289  | USA          | .94 | on cART          | Self-report                 | predictor           | Age, Male gender, Current substance use, Depressive Symptoms                                                                                                                                                                                                                       |
| Murphy 2004 (144)              | 115  | USA          | .95 | on cART          | Self-report                 | correlate           | Age, Male gender, Trust/Satisfaction with health care provider, Current substance use, Social Support, Depressive Symptoms                                                                                                                                                         |
| Murri 2001 (145)               | 140  | Italy        | .90 | on cART          | Self-report                 | predictor           | Age, Male gender, Current substance use, Depressive Symptoms                                                                                                                                                                                                                       |
| Nakimuli 2009 (146)            | 122  | Uganda       | .42 | on cART          | Self-report                 | correlate           | Age, Male gender, Duration of cART                                                                                                                                                                                                                                                 |
| Nakimuli 2013 (147)            | 400  | Uganda       | .45 | on cART          | Pill count                  | predictor           | Age, Male gender, Financial constraints, Adherence self efficacy, Social support                                                                                                                                                                                                   |
| Negash 2013 (148)              | 355  | Ethiopia     | .36 | on cART          | Self-report                 | correlate           | Male gender, HIV stigma, Depressive symptoms                                                                                                                                                                                                                                       |
| Nel 2013 (149)                 | 94   | South Africa | .62 | on cART          | Self-report                 | correlate           | Depressive symptoms                                                                                                                                                                                                                                                                |
| Nelsen 2013 (150)              | 244  | USA          | .90 | on cART          | Self-report                 | correlate           | Age, Male gender, Time since HIV diagnosis, CD4 cell count                                                                                                                                                                                                                         |
| Nelson 2013 (151)              | 1676 | USA          | .94 | Start/switch     | Pharmacy refill             | predictor           | PI containing regimen                                                                                                                                                                                                                                                              |
| Nieuwkerk 2001 (152)           | 160  | Netherlands  | .92 | on cART          | Self-report                 | predictor           | Age, Male gender, CD4 cell count                                                                                                                                                                                                                                                   |
| Nillson Schonnesson 2006 (153) | 144  | Sweden       | .94 | on cART          | Self-report                 | predictor           | Age, Male gender, Trust/Satisfaction with health care provider, Time since HIV diagnosis, Social Support, Adherence Self Efficacy, Pill Burden, PI containing regimen, Necessity/Utility of cART, Daily dosing frequency, Concerns about cART, CD4 cell count, Depressive Symptoms |
| Nozaki 2011 (154)              | 518  | Zambia       | .43 | on cART          | Self-report                 | correlate           | Age, Male gender, Duration of cART, Social support, HIV stigma, Financial constraints                                                                                                                                                                                              |

| Reference               | N    | Country      | HDI | Treatment status | Adherence assessment method | Predictor/correlate | Factors                                                                                                                                                                                                                                                    |
|-------------------------|------|--------------|-----|------------------|-----------------------------|---------------------|------------------------------------------------------------------------------------------------------------------------------------------------------------------------------------------------------------------------------------------------------------|
| OConnor 2013 (155)      | 5295 | USA          | .94 | Start/switch     | Self-report                 | predictor           | Age, Male gender, Pill burden, Daily dosing frequency, PI containing regimen                                                                                                                                                                               |
| Oku 2014 (156)          | 393  | Nigeria      | .46 | on cART          | Self-report                 | correlate           | Age, Male gender, Financial constraints                                                                                                                                                                                                                    |
| Orrell 2003 (157)       | 289  | South Africa | .67 | Start/switch     | Pill count                  | predictor           | Age, Male gender, CD4 cell count, Daily dosing frequency, Financial constraints, PI containing regimen                                                                                                                                                     |
| Oguyi 2007 (158)        | 97   | Uganda       | .49 | on cART          | Electronic monitoring       | predictor           | Age, Male gender, Current substance use, CD4 cell count, Financial Constraints, Depressive Symptoms                                                                                                                                                        |
| Parutti 2006 (159)      | 171  | Italy        | .93 | Start/switch     | Pharmacy refill             | predictor           | Age, Male gender, Current substance use, Pill Burden, PI containing regimen, Financial Constraints                                                                                                                                                         |
| Paterson 2000 (160)     | 99   | USA          | .94 | on cART          | Electronic monitoring       | predictor           | Age, Male gender, Financial Constraints, Depressive Symptoms, Necessity/utility cART                                                                                                                                                                       |
| Pefura 2013 (161)       | 889  | Cameroon     | .48 | on cART          | Self-report                 | correlate           | Male gender, Current substance use, CD4 cell count, Depressive symptoms, duration of cART                                                                                                                                                                  |
| Peltzer 2010 (162)      | 519  | South Africa | .60 | on cART          | Self-report                 | correlate           | Age, Male gender, Financial constraints, CD4 cell count, Time since HIV diagnosis, Depressive symptoms, Concurrent substance use, HIV stigma, Social support                                                                                               |
| Peretti 2006 (163)      | 1809 | France       | .94 | on cART          | Self-report                 | correlate           | Age, Time since HIV diagnosis, Current substance use, HIV Stigma, Financial Constraints                                                                                                                                                                    |
| Pinheiro 2002 (164)     | 195  | Brasil       | .75 | on cART          | Self-report                 | correlate           | Age, Male gender, Adherence Self Efficacy, Necessity/Utility of cART, Duration of cART, Daily dosing frequency, Financial Constraints                                                                                                                      |
| Plankey 2009 (165)      | 1671 | USA          | .93 | on cART          | Self-report                 | predictor           | Age, Current substance use                                                                                                                                                                                                                                 |
| Poguette 2013 (166)     | 74   | USA          | .90 | on cART          | Electronic monitoring       | predictor           | Age, Male gender, Depressive symptoms, Pill burden, duration of cART                                                                                                                                                                                       |
| Power 2003 (167)        | 73   | USA          | .94 | on cART          | Self-report                 | correlate           | Age, Male gender, Social support                                                                                                                                                                                                                           |
| Pratt 2001 (168)        | 260  | USA          | .93 | on cART          | Self-report                 | correlate           | Daily dosing frequency, Depressive symptoms, Male gender, Pill burden, Social support, Current substance use                                                                                                                                               |
| Protopopescu 2009 (169) | 1010 | France       | .92 | on cART          | Self-report                 | predictor           | Age, Male gender, Trust/Satisfaction with health care provider, Time since HIV diagnosis, Social Support, Pill Burden, PI containing regimen, Daily dosing frequency, Financial Constraints, Depressive Symptoms, CD4 cell count, Concurrent substance use |

| Reference                   | N   | Country        | HDI | Treatment status | Adherence assessment method | Predictor/correlate | Factors                                                                                                                                                                                                     |
|-----------------------------|-----|----------------|-----|------------------|-----------------------------|---------------------|-------------------------------------------------------------------------------------------------------------------------------------------------------------------------------------------------------------|
| Raboud 2011 (170)           | 779 | Canada         | .91 | on cART          | Self-report                 | correlate           | Age, Male gender, Financial constraints, Daily dosing frequency, Depressive symptoms, Social support, HIV stigma, Time since HIV diagnosis, Duration of cART, PI containing regimen                         |
| Ramadhani 2007 (171)        | 150 | Tanzania       | .53 | on cART          | Self-report                 | correlate           | Age, Male gender, Depressive symptoms, HIV stigma, Duration of cART, CD4 cell count                                                                                                                         |
| Rao 2012 (172)              | 720 | USA            | .91 | on cART          | Self-report                 | correlate           | HIV stigma, Depressive symptoms                                                                                                                                                                             |
| Reynolds 2004 (173)         | 980 | USA            | .94 | Start/switch     | Self-report                 | correlate           | Social Support, Depressive Symptoms                                                                                                                                                                         |
| Remien 2007 (174)           | 200 | Brazil         | .81 | On cART          | Self-report                 | correlate           | Age, Male gender, Financial constraints, Pill burden, Daily dosing frequency, Social support, Trust/satisfaction health care provider, Adherence self-efficacy, Necessity/utility cART, Concerns about cART |
| Rintamaki 2006 (175)        | 204 | USA            | .94 | on cART          | Self-report                 | correlate           | Age, Male gender, HIV Stigma, Pill Burden                                                                                                                                                                   |
| Rodrigues 2012 (176)        | 150 | India          | .55 | on cART          | Pill count                  | predictor           | Age, Male gender, CD4 cell count, Financial constraints, Time since HIV diagnosis, duration of cART                                                                                                         |
| Rougemont 2009 (177)        | 219 | Cameroon       | .52 | Start/switch     | Pharmacy refill             | predictor           | Male gender, HIV Stigma, Daily dosing frequency, CD4 cell count                                                                                                                                             |
| Safren 2005 (178)           | 304 | India          | .60 | on cART          | Self-report                 | correlate           | Age, Male gender, Financial constraints<br>Duration of cART                                                                                                                                                 |
| Sasaki 2012 (179)           | 157 | Zambia         | .43 | on cART          | Self-report                 | correlate           | Age, Male gender, Time since HIV diagnosis, HIV stigma                                                                                                                                                      |
| Sayles 2009 (180)           | 142 | USA            | .91 | on cART          | Self-report                 | correlate           | Age, Male gender, CD4 cell count, Time since HIV diagnosis, Financial constraints, HIV stigma                                                                                                               |
| Schneider 2004 (181)        | 554 | USA            | .95 | on cART          | Self-report                 | correlate           | Age, Provider trust /satisfaction                                                                                                                                                                           |
| Seguy (182)                 | 689 | Brazil         | .81 | on cART          | Pharmacy refill             | correlate           | Age, Male gender, Time since HIV diagnosis, CD4 cell count, PI containing regimen, Pill burden                                                                                                              |
| Sellier 2006 (183)          | 39  | France         | .96 | on cART          | Self-report                 | correlate           | Age, Male gender, Financial constraints, Duration of cART, Pill burden, HIV stigma                                                                                                                          |
| Servellen van 2002 (184)    | 182 | USA            | .94 | on cART          | Self-report                 | correlate           | Age, Male gender, Trust/Satisfaction with health care provider, Social Support, Financial Constraints, Depressive Symptoms                                                                                  |
| Shah 2007 (185)             | 276 | India          | .61 | on cART          | Self-report                 | correlate           | Age, Financial constraints, Pill burden, Social support, Adherence self efficacy                                                                                                                            |
| Sherr 2008, 2010 (186, 187) | 502 | United Kingdom | .95 | on cART          | Self-report                 | correlate           | Age, Male gender, HIV Stigma, Social Support, Financial Constraints, Depressive Symptoms                                                                                                                    |

| Reference            | N    | Country     | HDI | Treatment status | Adherence assessment method | Predictor/correlate | Factors                                                                                                                                                                                                       |
|----------------------|------|-------------|-----|------------------|-----------------------------|---------------------|---------------------------------------------------------------------------------------------------------------------------------------------------------------------------------------------------------------|
| Shuter 2008 (188)    | 64   | USA         | .96 | on cART          | Electronic monitoring       | predictor           | Age, Male gender, Current substance use, CD4 cell count, Depressive Symptoms                                                                                                                                  |
| Silva 2009 (189)     | 412  | Brasil      | .70 | on cART          | Self-report                 | correlate           | Age, Male gender, Duration of cART, Time since HIV infection, Pill burden, Financial constraints, Depressive symptoms                                                                                         |
| Simoni 2002 (190)    | 50   | USA         | .93 | on cART          | Self-report                 | correlate           | Age, Male gender, Time since HIV diagnosis, Current substance use, Social Support, Adherence Self Efficacy, Depressive Symptoms                                                                               |
| Simoni 2012 (191)    | 1809 | USA         | .91 | on cART          | Electronic monitoring       | predictor           | Age, Male gender, Current substance use, Financial Constraints, Depressive Symptoms                                                                                                                           |
| Singh 1999 (192)     | 123  | USA         | .93 | on cART          | Pharmacy refill             | predictor           | Age, Financial Constraints, Social Support                                                                                                                                                                    |
| Sodergard 2006 (193) | 946  | Sweden      | .96 | on cART          | Self-report                 | correlate           | Age, Concurrent substance use, Duration of cART, Social support, Daily dosing frequency                                                                                                                       |
| Spire 2002 (194)     | 445  | France      | .92 | on cART          | Self-report                 | predictor           | Age, Male gender, Trust/Satisfaction with health care provider, Time since HIV diagnosis, Current substance use, HIV Stigma, Social Support, Necessity/Utility of cART, CD4 cell count, Financial Constraints |
| Stirratt 2006 (195)  | 215  | USA         | .96 | on cART          | Electronic monitoring       | predictor           | Adherence self-efficacy, HIV stigma, Pill burden, Depressive symptoms                                                                                                                                         |
| Sullivan 2007 (196)  | 5887 | USA         | .94 | on cART          | Self-report                 | correlate           | Age, Current substance use, Pill Burden, PI containing regimen, Duration of cART, Depressive Symptoms                                                                                                         |
| Sumari 2011 (197)    | 202  | Netherlands | .90 | on cART          | Pharmacy refill             | correlate           | Age, Male gender, Time since HIV diagnosis, HIV Stigma, PI containing regimen, Necessity/Utility of cART, Duration of cART, Concerns about cART, Depressive Symptoms                                          |
| Tadios 2006 (198)    | 431  | Ethiopia    | .40 | on cART          | Self-report                 | correlate           | Age, Financial constraints, HIV stigma, Necessity/utility cART, Adherence self efficacy, Depressive symptoms, Provider trust/satisfaction                                                                     |
| Tedaldi 2012 (199)   | 539  | USA         | .95 | on cART          | Self-report                 | predictor           | Male gender, Current substance use, Time since HIV diagnosis, Depressive symptoms                                                                                                                             |
| Teixeira 2012 (200)  | 144  | Brasil      | .81 | on cART          | Self-report                 | correlate           | Current substance use                                                                                                                                                                                         |
| Thrasher 2008 (201)  | 1886 | USA         | .93 | on cART          | Self-report                 | correlate           | Age, Male gender, Trust/Satisfaction with health care provider, Time since HIV diagnosis, Social Support, Pill Burden, Necessity/Utility of cART, CD4 cell count, Depressive Symptoms                         |

| Reference             | N    | Country  | HDI | Treatment status | Adherence assessment method | Predictor/correlate | Factors                                                                                                                                                                                                                              |
|-----------------------|------|----------|-----|------------------|-----------------------------|---------------------|--------------------------------------------------------------------------------------------------------------------------------------------------------------------------------------------------------------------------------------|
| Tiyou 2010 (202)      | 306  | Ethiopia | .35 | on cART          | Self-report                 | correlate           | Male gender, Social Support, Financial Constraints                                                                                                                                                                                   |
| Tran 2013 (203)       | 1016 | Vietnam  | .59 | on cART          | Self-report                 | correlate           | Financial constraints, duration of cART, Adherence self efficacy                                                                                                                                                                     |
| Trotta 2003 (204)     | 596  | Italy    | .93 | on cART          | Self-report                 | correlate           | Age, CD4 cell count, PI containing regimen                                                                                                                                                                                           |
| Ubbiali 2008 (205)    | 478  | Italy    | .87 | on cART          | Self-report                 | correlate           | Male gender                                                                                                                                                                                                                          |
| Ukwe 2010 (206)       | 299  | Nigeria  | .45 | on cART          | Self-report                 | predictor           | Age, Male gender, Trust/Satisfaction with health care provider, Current substance use, Necessity/Utility of cART, Financial Constraints                                                                                              |
| Unge 2010 (207)       | 352  | Kenya    | .54 | Start/on cART    | Self-report                 | predictor           | Age, Male gender, Duration cART, Current substance use, Financial constraints, Social support, HIV stigma                                                                                                                            |
| Uuskula 2012 (208)    | 144  | Estonia  | .81 | on cART          | Self-report                 | correlate           | Age, Male gender, Time since HIV diagnosis, Current substance use, Pill Burden, Necessity/Utility of cART, Duration of cART, Daily dosing frequency, Concerns about cART, CD4 cell count, Financial Constraints, Depressive Symptoms |
| Venkatesh 2010 (209)  | 198  | India    | .53 | on cART          | Self-report                 | correlate           | Age, Male gender, Current substance use, Duration of cART, CD4 cell count, Financial Constraints, Depressive Symptoms                                                                                                                |
| Vyavahakar 2007 (210) | 224  | USA      | .96 | on cART          | Self-report                 | correlate           | Age, Social Support, Financial Constraints                                                                                                                                                                                           |
| Wagner 2002 (211)     | 61   | USA      | .94 | on cART          | Electronic monitoring       | predictor           | Age, Male gender, Adherence Self Efficacy, Pill Burden, PI containing regimen, Necessity/Utility of cART, Daily dosing frequency, CD4 cell count, Financial Constraints                                                              |
| Wagner 2012 (212)     | 182  | USA      | .91 | on cART          | Electronic monitoring       | predictor           | Age, Time since HIV diagnosis, Current substance use, HIV Stigma, Financial Constraints, Depressive Symptoms                                                                                                                         |
| Waite 2008 (213)      | 204  | USA      | .94 | on cART          | Self-report                 | correlate           | HIV Stigma                                                                                                                                                                                                                           |
| Wanchu 2006 (214)     | 200  | India    | .60 | On cART          | Self-report                 | correlate           | Male gender                                                                                                                                                                                                                          |
| Wang 2007 (215)       | 181  | China    | .77 | on cART          | Self-report                 | correlate           | Age, Male gender, Financial constraints, Duration of cART, Necessity/utility cART, Concurrent substance use, Trust /satisfaction health care provider, HIV stigma                                                                    |

| Reference           | N   | Country  | HDI | Treatment status | Adherence assessment method | Predictor/correlate | Factors                                                                                                                                                   |
|---------------------|-----|----------|-----|------------------|-----------------------------|---------------------|-----------------------------------------------------------------------------------------------------------------------------------------------------------|
| Wasti 2010 (216)    | 330 | Nepal    | .45 | on cART          | Self-report                 | correlate           | Age, Male gender, Current substance use, HIV Stigma, Pill Burden, Necessity/Utility of cART, Duration of cART, Concerns about cART, Financial Constraints |
| Watt 2010 (217)     | 340 | Tanzania | .40 | on cART          | Self-report                 | correlate           | Adherence self efficacy, Provider trust/satisfaction                                                                                                      |
| Weaver 2005 (218)   | 322 | USA      | .95 | on cART          | Electronic monitoring       | predictor           | Age, Time since HIV diagnosis, Social Support, Pill Burden, Financial Constraints                                                                         |
| Webb 2009 (219)     | 168 | USA      | .94 | on cART          | Self-report                 | correlate           | Depressive Symptoms                                                                                                                                       |
| Weidle 2006 (220)   | 987 | Uganda   |     | Start/switch     | Pill count                  | predictor           | Age, Male gender, Depressive symptoms, CD4 cell count, Concurrent substance use                                                                           |
| Woods 2009 (221)    | 79  | USA      | .96 | on cART          | Electronic monitoring       | predictor           | Age, Time since HIV diagnosis, Pill Burden, Daily dosing frequency, Duration of cART, CD4 cell count                                                      |
| Woodward 2013 (222) | 136 | USA      | .95 | on cART          | Self-report                 | correlate           | Social support, Depressive symptoms                                                                                                                       |
| Yun 2005 (223)      | 506 | USA      | .93 | on cART          | Pharmacy refill             | correlate           | Age, Male gender, Current substance use, Financial Constraints                                                                                            |
